# Supplementary material
Source: publisher figshare collection journal article supplement (https://acs.figshare.com/ndownloader/files/14342843)
Supplement: Supplementary file 1 [file 14342843]

## Sheet: S1_Excel. Dihedral Division
substituents	cutoff	wSterimol	conf	values
nButyl	3	wL	conf1	5.33
nButyl	3	wB1	conf1	1.88
nButyl	3	wB5	conf1	4.97
nButyl	4	wL	conf1	6.06
nButyl	4	wB1	conf1	1.89
nButyl	4	wB5	conf1	4.69
nButyl	5	wL	conf1	6.08
nButyl	5	wB1	conf1	1.89
nButyl	5	wB5	conf1	4.65
nButyl	6	wL	conf1	6.01
nButyl	6	wB1	conf1	1.89
nButyl	6	wB5	conf1	4.68
nButyl	7	wL	conf1	6.01
nButyl	7	wB1	conf1	1.89
nButyl	7	wB5	conf1	4.69
nButyl	8	wL	conf1	5.98
nButyl	8	wB1	conf1	1.89
nButyl	8	wB5	conf1	4.69
nButyl	3	wL	conf2	5.94
nButyl	3	wB1	conf2	1.89
nButyl	3	wB5	conf2	4.64
nButyl	4	wL	conf2	6.05
nButyl	4	wB1	conf2	1.88
nButyl	4	wB5	conf2	4.7
nButyl	5	wL	conf2	6.03
nButyl	5	wB1	conf2	1.89
nButyl	5	wB5	conf2	4.69
nButyl	6	wL	conf2	6.02
nButyl	6	wB1	conf2	1.88
nButyl	6	wB5	conf2	4.67
nButyl	7	wL	conf2	5.99
nButyl	7	wB1	conf2	1.88
nButyl	7	wB5	conf2	4.71
nButyl	8	wL	conf2	5.99
nButyl	8	wB1	conf2	1.88
nButyl	8	wB5	conf2	4.71
nButyl	3	wL	conf3	5.31
nButyl	3	wB1	conf3	1.89
nButyl	3	wB5	conf3	4.96
nButyl	4	wL	conf3	6.04
nButyl	4	wB1	conf3	1.88
nButyl	4	wB5	conf3	4.7
nButyl	5	wL	conf3	6.07
nButyl	5	wB1	conf3	1.89
nButyl	5	wB5	conf3	4.71
nButyl	6	wL	conf3	6.02
nButyl	6	wB1	conf3	1.88
nButyl	6	wB5	conf3	4.67
nButyl	7	wL	conf3	6.01
nButyl	7	wB1	conf3	1.89
nButyl	7	wB5	conf3	4.7
nButyl	8	wL	conf3	5.99
nButyl	8	wB1	conf3	1.89
nButyl	8	wB5	conf3	4.71
nButyl	3	wL	conf4	5.04
nButyl	3	wB1	conf4	1.89
nButyl	3	wB5	conf4	4.98
nButyl	4	wL	conf4	6.06
nButyl	4	wB1	conf4	1.88
nButyl	4	wB5	conf4	4.69
nButyl	5	wL	conf4	6.08
nButyl	5	wB1	conf4	1.88
nButyl	5	wB5	conf4	4.66
nButyl	6	wL	conf4	6.02
nButyl	6	wB1	conf4	1.89
nButyl	6	wB5	conf4	4.67
nButyl	7	wL	conf4	6.01
nButyl	7	wB1	conf4	1.89
nButyl	7	wB5	conf4	4.68
nButyl	8	wL	conf4	5.97
nButyl	8	wB1	conf4	1.88
nButyl	8	wB5	conf4	4.71
nButyl	3	wL	conf5	5.98
nButyl	3	wB1	conf5	1.9
nButyl	3	wB5	conf5	4.63
nButyl	4	wL	conf5	6.05
nButyl	4	wB1	conf5	1.88
nButyl	4	wB5	conf5	4.71
nButyl	5	wL	conf5	6.07
nButyl	5	wB1	conf5	1.89
nButyl	5	wB5	conf5	4.66
nButyl	6	wL	conf5	6.03
nButyl	6	wB1	conf5	1.88
nButyl	6	wB5	conf5	4.67
nButyl	7	wL	conf5	6.01
nButyl	7	wB1	conf5	1.89
nButyl	7	wB5	conf5	4.68
nButyl	8	wL	conf5	6
nButyl	8	wB1	conf5	1.88
nButyl	8	wB5	conf5	4.69
nButyl	3	wL	conf6	5.31
nButyl	3	wB1	conf6	1.88
nButyl	3	wB5	conf6	4.98
nButyl	4	wL	conf6	6.04
nButyl	4	wB1	conf6	1.89
nButyl	4	wB5	conf6	4.69
nButyl	5	wL	conf6	6.07
nButyl	5	wB1	conf6	1.88
nButyl	5	wB5	conf6	4.66
nButyl	6	wL	conf6	6.01
nButyl	6	wB1	conf6	1.88
nButyl	6	wB5	conf6	4.69
nButyl	7	wL	conf6	6.02
nButyl	7	wB1	conf6	1.88
nButyl	7	wB5	conf6	4.67
nButyl	8	wL	conf6	5.99
nButyl	8	wB1	conf6	1.89
nButyl	8	wB5	conf6	4.7
nButyl	3	wL	conf7	5.34
nButyl	3	wB1	conf7	1.89
nButyl	3	wB5	conf7	4.95
nButyl	4	wL	conf7	6.04
nButyl	4	wB1	conf7	1.88
nButyl	4	wB5	conf7	4.71
nButyl	5	wL	conf7	6.04
nButyl	5	wB1	conf7	1.88
nButyl	5	wB5	conf7	4.71
nButyl	6	wL	conf7	6.08
nButyl	6	wB1	conf7	1.88
nButyl	6	wB5	conf7	4.65
nButyl	7	wL	conf7	6.01
nButyl	7	wB1	conf7	1.89
nButyl	7	wB5	conf7	4.7
nButyl	8	wL	conf7	5.99
nButyl	8	wB1	conf7	1.88
nButyl	8	wB5	conf7	4.7
nButyl	3	wL	conf8	5.33
nButyl	3	wB1	conf8	1.89
nButyl	3	wB5	conf8	4.98
nButyl	4	wL	conf8	6.04
nButyl	4	wB1	conf8	1.88
nButyl	4	wB5	conf8	4.71
nButyl	5	wL	conf8	6.03
nButyl	5	wB1	conf8	1.88
nButyl	5	wB5	conf8	4.72
nButyl	6	wL	conf8	6.03
nButyl	6	wB1	conf8	1.88
nButyl	6	wB5	conf8	4.67
nButyl	7	wL	conf8	6
nButyl	7	wB1	conf8	1.88
nButyl	7	wB5	conf8	4.71
nButyl	8	wL	conf8	6
nButyl	8	wB1	conf8	1.88
nButyl	8	wB5	conf8	4.71
nButyl	3	wL	conf9	5.16
nButyl	3	wB1	conf9	1.89
nButyl	3	wB5	conf9	5.02
nButyl	4	wL	conf9	6.02
nButyl	4	wB1	conf9	1.88
nButyl	4	wB5	conf9	4.71
nButyl	5	wL	conf9	6.07
nButyl	5	wB1	conf9	1.88
nButyl	5	wB5	conf9	4.66
nButyl	6	wL	conf9	6.02
nButyl	6	wB1	conf9	1.88
nButyl	6	wB5	conf9	4.69
nButyl	7	wL	conf9	6
nButyl	7	wB1	conf9	1.89
nButyl	7	wB5	conf9	4.69
nButyl	8	wL	conf9	6
nButyl	8	wB1	conf9	1.89
nButyl	8	wB5	conf9	4.69
nPentyl	3	wL	conf1	5.17
nPentyl	3	wB1	conf1	1.88
nPentyl	3	wB5	conf1	6
nPentyl	4	wL	conf1	6.42
nPentyl	4	wB1	conf1	1.89
nPentyl	4	wB5	conf1	5.33
nPentyl	5	wL	conf1	6.58
nPentyl	5	wB1	conf1	1.89
nPentyl	5	wB5	conf1	5.29
nPentyl	6	wL	conf1	6.49
nPentyl	6	wB1	conf1	1.89
nPentyl	6	wB5	conf1	5.3
nPentyl	7	wL	conf1	6.36
nPentyl	7	wB1	conf1	1.89
nPentyl	7	wB5	conf1	5.36
nPentyl	8	wL	conf1	6.41
nPentyl	8	wB1	conf1	1.89
nPentyl	8	wB5	conf1	5.28
nPentyl	3	wL	conf2	5.64
nPentyl	3	wB1	conf2	1.89
nPentyl	3	wB5	conf2	5.57
nPentyl	4	wL	conf2	6.44
nPentyl	4	wB1	conf2	1.88
nPentyl	4	wB5	conf2	5.31
nPentyl	5	wL	conf2	6.46
nPentyl	5	wB1	conf2	1.88
nPentyl	5	wB5	conf2	5.37
nPentyl	6	wL	conf2	6.48
nPentyl	6	wB1	conf2	1.89
nPentyl	6	wB5	conf2	5.33
nPentyl	7	wL	conf2	6.32
nPentyl	7	wB1	conf2	1.89
nPentyl	7	wB5	conf2	5.37
nPentyl	8	wL	conf2	6.34
nPentyl	8	wB1	conf2	1.89
nPentyl	8	wB5	conf2	5.4
nPentyl	3	wL	conf3	5.3
nPentyl	3	wB1	conf3	1.88
nPentyl	3	wB5	conf3	5.91
nPentyl	4	wL	conf3	6.42
nPentyl	4	wB1	conf3	1.89
nPentyl	4	wB5	conf3	5.31
nPentyl	5	wL	conf3	6.49
nPentyl	5	wB1	conf3	1.89
nPentyl	5	wB5	conf3	5.31
nPentyl	6	wL	conf3	6.49
nPentyl	6	wB1	conf3	1.89
nPentyl	6	wB5	conf3	5.31
nPentyl	7	wL	conf3	6.34
nPentyl	7	wB1	conf3	1.89
nPentyl	7	wB5	conf3	5.37
nPentyl	8	wL	conf3	6.34
nPentyl	8	wB1	conf3	1.89
nPentyl	8	wB5	conf3	5.37
nPentyl	3	wL	conf4	5.19
nPentyl	3	wB1	conf4	1.88
nPentyl	3	wB5	conf4	6.07
nPentyl	4	wL	conf4	6.44
nPentyl	4	wB1	conf4	1.88
nPentyl	4	wB5	conf4	5.31
nPentyl	5	wL	conf4	6.37
nPentyl	5	wB1	conf4	1.89
nPentyl	5	wB5	conf4	5.39
nPentyl	6	wL	conf4	6.47
nPentyl	6	wB1	conf4	1.89
nPentyl	6	wB5	conf4	5.31
nPentyl	7	wL	conf4	6.32
nPentyl	7	wB1	conf4	1.89
nPentyl	7	wB5	conf4	5.36
nPentyl	8	wL	conf4	6.32
nPentyl	8	wB1	conf4	1.89
nPentyl	8	wB5	conf4	5.41
nPentyl	3	wL	conf5	5.58
nPentyl	3	wB1	conf5	1.88
nPentyl	3	wB5	conf5	5.75
nPentyl	4	wL	conf5	6.41
nPentyl	4	wB1	conf5	1.89
nPentyl	4	wB5	conf5	5.32
nPentyl	5	wL	conf5	6.49
nPentyl	5	wB1	conf5	1.89
nPentyl	5	wB5	conf5	5.32
nPentyl	6	wL	conf5	6.5
nPentyl	6	wB1	conf5	1.89
nPentyl	6	wB5	conf5	5.29
nPentyl	7	wL	conf5	6.33
nPentyl	7	wB1	conf5	1.89
nPentyl	7	wB5	conf5	5.33
nPentyl	8	wL	conf5	6.31
nPentyl	8	wB1	conf5	1.89
nPentyl	8	wB5	conf5	5.4
nPentyl	3	wL	conf6	5.24
nPentyl	3	wB1	conf6	1.88
nPentyl	3	wB5	conf6	5.88
nPentyl	4	wL	conf6	6.43
nPentyl	4	wB1	conf6	1.88
nPentyl	4	wB5	conf6	5.31
nPentyl	5	wL	conf6	6.46
nPentyl	5	wB1	conf6	1.89
nPentyl	5	wB5	conf6	5.34
nPentyl	6	wL	conf6	6.47
nPentyl	6	wB1	conf6	1.88
nPentyl	6	wB5	conf6	5.33
nPentyl	7	wL	conf6	6.31
nPentyl	7	wB1	conf6	1.89
nPentyl	7	wB5	conf6	5.36
nPentyl	8	wL	conf6	6.39
nPentyl	8	wB1	conf6	1.89
nPentyl	8	wB5	conf6	5.36
nPentyl	3	wL	conf7	5.85
nPentyl	3	wB1	conf7	1.89
nPentyl	3	wB5	conf7	5.79
nPentyl	4	wL	conf7	6.43
nPentyl	4	wB1	conf7	1.88
nPentyl	4	wB5	conf7	5.32
nPentyl	5	wL	conf7	6.44
nPentyl	5	wB1	conf7	1.89
nPentyl	5	wB5	conf7	5.32
nPentyl	6	wL	conf7	6.48
nPentyl	6	wB1	conf7	1.88
nPentyl	6	wB5	conf7	5.33
nPentyl	7	wL	conf7	6.34
nPentyl	7	wB1	conf7	1.89
nPentyl	7	wB5	conf7	5.32
nPentyl	8	wL	conf7	6.26
nPentyl	8	wB1	conf7	1.89
nPentyl	8	wB5	conf7	5.42
nPentyl	3	wL	conf8	5.16
nPentyl	3	wB1	conf8	1.89
nPentyl	3	wB5	conf8	6.02
nPentyl	4	wL	conf8	6.44
nPentyl	4	wB1	conf8	1.89
nPentyl	4	wB5	conf8	5.28
nPentyl	5	wL	conf8	6.44
nPentyl	5	wB1	conf8	1.88
nPentyl	5	wB5	conf8	5.33
nPentyl	6	wL	conf8	6.44
nPentyl	6	wB1	conf8	1.89
nPentyl	6	wB5	conf8	5.37
nPentyl	7	wL	conf8	6.31
nPentyl	7	wB1	conf8	1.88
nPentyl	7	wB5	conf8	5.34
nPentyl	8	wL	conf8	6.38
nPentyl	8	wB1	conf8	1.89
nPentyl	8	wB5	conf8	5.38
nPentyl	3	wL	conf9	5.67
nPentyl	3	wB1	conf9	1.88
nPentyl	3	wB5	conf9	5.61
nPentyl	4	wL	conf9	6.44
nPentyl	4	wB1	conf9	1.88
nPentyl	4	wB5	conf9	5.32
nPentyl	5	wL	conf9	6.41
nPentyl	5	wB1	conf9	1.89
nPentyl	5	wB5	conf9	5.34
nPentyl	6	wL	conf9	6.5
nPentyl	6	wB1	conf9	1.88
nPentyl	6	wB5	conf9	5.3
nPentyl	7	wL	conf9	6.35
nPentyl	7	wB1	conf9	1.89
nPentyl	7	wB5	conf9	5.34
nPentyl	8	wL	conf9	6.33
nPentyl	8	wB1	conf9	1.88
nPentyl	8	wB5	conf9	5.38
nHexyl	3	wL	conf1	6.18
nHexyl	3	wB1	conf1	1.88
nHexyl	3	wB5	conf1	6.5
nHexyl	4	wL	conf1	7.19
nHexyl	4	wB1	conf1	1.89
nHexyl	4	wB5	conf1	6.16
nHexyl	5	wL	conf1	7.17
nHexyl	5	wB1	conf1	1.89
nHexyl	5	wB5	conf1	6.1
nHexyl	6	wL	conf1	7.03
nHexyl	6	wB1	conf1	1.89
nHexyl	6	wB5	conf1	6.21
nHexyl	7	wL	conf1	6.99
nHexyl	7	wB1	conf1	1.89
nHexyl	7	wB5	conf1	6.17
nHexyl	8	wL	conf1	7.04
nHexyl	8	wB1	conf1	1.89
nHexyl	8	wB5	conf1	6.2
nHexyl	3	wL	conf2	5.87
nHexyl	3	wB1	conf2	1.88
nHexyl	3	wB5	conf2	6.67
nHexyl	4	wL	conf2	7.15
nHexyl	4	wB1	conf2	1.89
nHexyl	4	wB5	conf2	6.2
nHexyl	5	wL	conf2	7.11
nHexyl	5	wB1	conf2	1.89
nHexyl	5	wB5	conf2	6.21
nHexyl	6	wL	conf2	7.03
nHexyl	6	wB1	conf2	1.89
nHexyl	6	wB5	conf2	6.19
nHexyl	7	wL	conf2	6.99
nHexyl	7	wB1	conf2	1.89
nHexyl	7	wB5	conf2	6.21
nHexyl	8	wL	conf2	6.94
nHexyl	8	wB1	conf2	1.89
nHexyl	8	wB5	conf2	6.24
nHexyl	3	wL	conf3	6.25
nHexyl	3	wB1	conf3	1.88
nHexyl	3	wB5	conf3	6.48
nHexyl	4	wL	conf3	7.21
nHexyl	4	wB1	conf3	1.89
nHexyl	4	wB5	conf3	6.12
nHexyl	5	wL	conf3	7.08
nHexyl	5	wB1	conf3	1.89
nHexyl	5	wB5	conf3	6.2
nHexyl	6	wL	conf3	7.09
nHexyl	6	wB1	conf3	1.89
nHexyl	6	wB5	conf3	6.14
nHexyl	7	wL	conf3	7.04
nHexyl	7	wB1	conf3	1.89
nHexyl	7	wB5	conf3	6.13
nHexyl	8	wL	conf3	6.95
nHexyl	8	wB1	conf3	1.89
nHexyl	8	wB5	conf3	6.21
nHexyl	3	wL	conf4	6.29
nHexyl	3	wB1	conf4	1.89
nHexyl	3	wB5	conf4	6.35
nHexyl	4	wL	conf4	7.18
nHexyl	4	wB1	conf4	1.89
nHexyl	4	wB5	conf4	6.17
nHexyl	5	wL	conf4	7.13
nHexyl	5	wB1	conf4	1.89
nHexyl	5	wB5	conf4	6.17
nHexyl	6	wL	conf4	7.02
nHexyl	6	wB1	conf4	1.89
nHexyl	6	wB5	conf4	6.2
nHexyl	7	wL	conf4	7.09
nHexyl	7	wB1	conf4	1.89
nHexyl	7	wB5	conf4	6.09
nHexyl	8	wL	conf4	7.01
nHexyl	8	wB1	conf4	1.89
nHexyl	8	wB5	conf4	6.13
nHexyl	3	wL	conf5	5.93
nHexyl	3	wB1	conf5	1.89
nHexyl	3	wB5	conf5	6.63
nHexyl	4	wL	conf5	7.22
nHexyl	4	wB1	conf5	1.89
nHexyl	4	wB5	conf5	6.15
nHexyl	5	wL	conf5	7.05
nHexyl	5	wB1	conf5	1.89
nHexyl	5	wB5	conf5	6.24
nHexyl	6	wL	conf5	7.06
nHexyl	6	wB1	conf5	1.89
nHexyl	6	wB5	conf5	6.17
nHexyl	7	wL	conf5	6.99
nHexyl	7	wB1	conf5	1.89
nHexyl	7	wB5	conf5	6.21
nHexyl	8	wL	conf5	6.96
nHexyl	8	wB1	conf5	1.89
nHexyl	8	wB5	conf5	6.21
nHexyl	3	wL	conf6	6.02
nHexyl	3	wB1	conf6	1.88
nHexyl	3	wB5	conf6	6.66
nHexyl	4	wL	conf6	7.14
nHexyl	4	wB1	conf6	1.89
nHexyl	4	wB5	conf6	6.19
nHexyl	5	wL	conf6	7.04
nHexyl	5	wB1	conf6	1.89
nHexyl	5	wB5	conf6	6.24
nHexyl	6	wL	conf6	7.09
nHexyl	6	wB1	conf6	1.89
nHexyl	6	wB5	conf6	6.14
nHexyl	7	wL	conf6	6.96
nHexyl	7	wB1	conf6	1.89
nHexyl	7	wB5	conf6	6.2
nHexyl	8	wL	conf6	6.95
nHexyl	8	wB1	conf6	1.89
nHexyl	8	wB5	conf6	6.22
nHexyl	3	wL	conf7	6.09
nHexyl	3	wB1	conf7	1.88
nHexyl	3	wB5	conf7	6.36
nHexyl	4	wL	conf7	7.1
nHexyl	4	wB1	conf7	1.89
nHexyl	4	wB5	conf7	6.24
nHexyl	5	wL	conf7	7.05
nHexyl	5	wB1	conf7	1.89
nHexyl	5	wB5	conf7	6.2
nHexyl	6	wL	conf7	7.04
nHexyl	6	wB1	conf7	1.89
nHexyl	6	wB5	conf7	6.2
nHexyl	7	wL	conf7	7.08
nHexyl	7	wB1	conf7	1.89
nHexyl	7	wB5	conf7	6.12
nHexyl	8	wL	conf7	6.97
nHexyl	8	wB1	conf7	1.89
nHexyl	8	wB5	conf7	6.19
nHexyl	3	wL	conf8	6.49
nHexyl	3	wB1	conf8	1.89
nHexyl	3	wB5	conf8	6.09
nHexyl	4	wL	conf8	7.18
nHexyl	4	wB1	conf8	1.89
nHexyl	4	wB5	conf8	6.18
nHexyl	5	wL	conf8	7.05
nHexyl	5	wB1	conf8	1.89
nHexyl	5	wB5	conf8	6.23
nHexyl	6	wL	conf8	7.07
nHexyl	6	wB1	conf8	1.89
nHexyl	6	wB5	conf8	6.19
nHexyl	7	wL	conf8	7.08
nHexyl	7	wB1	conf8	1.89
nHexyl	7	wB5	conf8	6.1
nHexyl	8	wL	conf8	7
nHexyl	8	wB1	conf8	1.89
nHexyl	8	wB5	conf8	6.23
nHexyl	3	wL	conf9	5.81
nHexyl	3	wB1	conf9	1.88
nHexyl	3	wB5	conf9	6.77
nHexyl	4	wL	conf9	7.13
nHexyl	4	wB1	conf9	1.89
nHexyl	4	wB5	conf9	6.21
nHexyl	5	wL	conf9	7.1
nHexyl	5	wB1	conf9	1.89
nHexyl	5	wB5	conf9	6.18
nHexyl	6	wL	conf9	7.05
nHexyl	6	wB1	conf9	1.89
nHexyl	6	wB5	conf9	6.2
nHexyl	7	wL	conf9	7.03
nHexyl	7	wB1	conf9	1.89
nHexyl	7	wB5	conf9	6.12
nHexyl	8	wL	conf9	6.98
nHexyl	8	wB1	conf9	1.89
nHexyl	8	wB5	conf9	6.19

## Sheet: S2_Excel. Clustering cut-off
substituents	cut-off (A)	wL (A)	wB1 (A)	wB5 (A)
nButyl	0.1	5.97	1.88	4.7
nButyl	0.3	6.07	1.88	4.66
nButyl	0.5	6.07	1.88	4.66
nButyl	0.8	6.07	1.88	4.66
nButyl	1	6.07	1.88	4.66
nPentyl	0.1	6.62	1.89	5.22
nPentyl	0.3	6.41	1.89	5.34
nPentyl	0.5	6.45	1.89	5.32
nPentyl	0.8	6.48	1.89	5.3
nPentyl	1	6.51	1.89	5.31
nHexyl	0.1	7.28	1.89	6.14
nHexyl	0.3	7.1	1.89	6.18
nHexyl	0.5	7.16	1.89	6.18
nHexyl	0.8	7.24	1.89	6.15
nHexyl	1	7.22	1.89	6.17
nHeptyl	0.1	7.66	1.89	6.79
nHeptyl	0.3	7.49	1.89	6.81
nHeptyl	0.5	7.53	1.89	6.73
nHeptyl	0.8	7.54	1.89	6.78
nHeptyl	1	7.69	1.89	6.79
sButyl	0.1	5.03	1.92	4.04
sButyl	0.3	5.03	1.92	4.04
sButyl	0.5	5.03	1.92	4.04
sButyl	0.8	5.03	1.92	4.03
sButyl	1	5.08	1.92	3.99

## Sheet: S3_Excel. Verloop's code
	Original Fortran			Python (CPK radii)			Python (Bondi radii)
Substituent	L	B1	B5	L1	B1	B5	L1	B1	B5
H	2.06	1	1	2.06	1	1	2.15	1.09	1.09
Me	3	1.52	2.04	3	1.52	2.04	3.2	1.65	2.13
Et	4.11	1.52	3.17	4.11	1.52	3.17	4.2	1.65	3.26
iPr	4.11	1.9	3.17	4.11	1.9	3.17	4.2	1.99	3.26
nBu	6.17	1.52	4.54	6.17	1.52	4.54	6.26	1.65	4.63
CH2iPr	5.05	1.52	4.45	5.05	1.52	4.45	5.25	1.65	4.54
c-Hexyl	6.17	1.91	3.49	6.17	1.9	3.49	6.26	1.99	3.58
nPr	5.05	1.52	3.49	5.05	1.52	3.49	5.25	1.65	3.58
adamantyl	6.17	3.16	3.49	6.17	3.16	3.49	6.26	3.25	3.58
tBu	4.11	2.77	3.17	4.11	2.76	3.17	4.2	2.85	3.26
CH2tBu	5.05	1.52	4.45	5.05	1.52	4.45	5.25	1.65	4.54
CHEt2	5.05	1.9	4.45	5.05	1.9	4.45	5.25	1.99	4.54
CHiPr2	5.05	2.05	4.45	5.05	2.04	4.45	5.25	2.13	4.54
CHPr2	6.17	1.9	5.67	6.17	1.9	5.67	6.26	1.99	5.76
CEt3	5.05	2.77	4.45	5.05	2.76	4.45	5.25	2.85	4.54
Phenyl	6.28	1.71	3.11	6.28	1.7	3.11	6.37	1.7	3.2
Bn	4.62	1.52	6.02	4.62	1.52	6.02	4.62	1.65	6.11
4-ClC6H5	7.74	1.8	3.11	7.74	1.8	3.11	7.69	1.75	3.2
4MePh	7.22	1.71	3.11	7.22	1.7	3.11	7.42	2.07	3.2
4MeOPh	8.2	1.78	3.11	8.2	1.78	3.11	8.29	1.81	3.2
35diMePh	6.28	1.71	4.3	6.28	1.7	4.3	6.37	2.13	4.39
1Nap	6.28	1.71	5.5	6.28	1.7	5.5	6.37	1.7	5.59

## Sheet: S4_Excel. atomic model
substituents	atomic_model	wL	wB1	wB5
sButyl	cpk	5.03	1.92	4.04
sButyl	bondi	5.12	2.01	4.13
nButyl	cpk	6.07	1.88	4.66
nButyl	bondi	6.21	1.98	4.73
nPentyl	cpk	6.41	1.89	5.34
nPentyl	bondi	6.57	1.98	5.44
nHexyl	cpk	7.1	1.89	6.18
nHexyl	bondi	7.21	1.98	6.25
Z-hex-3-enyl	cpk	6.62	1.89	6.27
Z-hex-3-enyl	bondi	6.77	1.98	6.38
Hex-5-enyl	cpk	7.2	1.89	6.02
Hex-5-enyl	bondi	7.34	1.98	6.08
E-hex-3-enyl	cpk	7.49	1.89	5.72
E-hex-3-enyl	bondi	7.58	1.98	5.81
E-hex-1-enyl	cpk	8.22	1.82	5.34
E-hex-1-enyl	bondi	8.31	1.9	5.43
nHeptyl	cpk	7.49	1.89	6.81
nHeptyl	bondi	7.68	1.98	6.84

## Sheet: S5_Excel. Level of theory
substituents	functionnal	wSterimol	values
hbonding	PM6-DH2	wL	5.45
hbonding	PM6-DH2	wB1	1.91
hbonding	PM6-DH2	wB5	4.17
hbonding	PM7	wL	5.51
hbonding	PM7	wB1	1.91
hbonding	PM7	wB5	4.07
hbonding	PM7 Precise	wL	5.4
hbonding	PM7 Precise	wB1	1.91
hbonding	PM7 Precise	wB5	4.14
hbonding	B3LYP	wL	5.6
hbonding	B3LYP	wB1	1.92
hbonding	B3LYP	wB5	3.91
hbonding	wB97xD	wL	5.33
hbonding	wB97xD	wB1	1.92
hbonding	wB97xD	wB5	4.03
hbonding	M06-2X	wL	5.17
hbonding	M06-2X	wB1	1.92
hbonding	M06-2X	wB5	4.1
linear	PM6-DH2	wL	6.1
linear	PM6-DH2	wB1	1.88
linear	PM6-DH2	wB5	4.66
linear	PM7	wL	6.12
linear	PM7	wB1	1.89
linear	PM7	wB5	4.65
linear	PM7 Precise	wL	6.1
linear	PM7 Precise	wB1	1.88
linear	PM7 Precise	wB5	4.66
linear	B3LYP	wL	6.3
linear	B3LYP	wB1	1.89
linear	B3LYP	wB5	4.59
linear	wB97xD	wL	5.9
linear	wB97xD	wB1	1.88
linear	wB97xD	wB5	4.69
linear	M06-2X	wL	5.87
linear	M06-2X	wB1	1.88
linear	M06-2X	wB5	4.68
nontrivial	PM6-DH2	wL	7.48
nontrivial	PM6-DH2	wB1	3.22
nontrivial	PM6-DH2	wB5	10.72
nontrivial	PM7	wL	7.81
nontrivial	PM7	wB1	3.58
nontrivial	PM7	wB5	10.6
nontrivial	PM7 Precise	wL	7.62
nontrivial	PM7 Precise	wB1	3.59
nontrivial	PM7 Precise	wB5	10.54
nontrivial	B3LYP	wL	6.93
nontrivial	B3LYP	wB1	3.98
nontrivial	B3LYP	wB5	10.61
nontrivial	wB97xD	wL	7.38
nontrivial	wB97xD	wB1	3.99
nontrivial	wB97xD	wB5	10.66
nontrivial	M06-2X	wL	7.31
nontrivial	M06-2X	wB1	4
nontrivial	M06-2X	wB5	10.65
pipi	PM6-DH2	wL	8.01
pipi	PM6-DH2	wB1	2.68
pipi	PM6-DH2	wB5	7.04
pipi	PM7	wL	7.63
pipi	PM7	wB1	2.73
pipi	PM7	wB5	6.95
pipi	PM7 Precise	wL	7.3
pipi	PM7 Precise	wB1	2.7
pipi	PM7 Precise	wB5	6.96
pipi	B3LYP	wL	7.48
pipi	B3LYP	wB1	2.86
pipi	B3LYP	wB5	7.2
pipi	wB97xD	wL	7.82
pipi	wB97xD	wB1	2.37
pipi	wB97xD	wB5	6.91
pipi	M06-2X	wL	7.54
pipi	M06-2X	wB1	2.4
pipi	M06-2X	wB5	6.92

## Sheet: S6_Excel. Level of theory
substituents	functionnal	file	E	L	B1	B5	dist
hbonding	PM6-DH2	molecule_100.out	4.78	4.55	1.93	4.55	0
hbonding	PM6-DH2	molecule_102.out	1.46	4.89	1.95	4.45	0.84
hbonding	PM6-DH2	molecule_132.out	0.29	4.96	1.9	4.41	6.07
hbonding	PM6-DH2	molecule_140.out	1.77	5.61	1.88	3.76	0.5
hbonding	PM6-DH2	molecule_141.out	1.58	5.62	1.93	3.75	0.69
hbonding	PM6-DH2	molecule_145.out	4.24	4.59	1.91	4.3	0.01
hbonding	PM6-DH2	molecule_146.out	4.11	4.6	1.98	4.3	0.01
hbonding	PM6-DH2	molecule_148.out	1.85	5.1	1.92	4.26	0.44
hbonding	PM6-DH2	molecule_149.out	1.02	4.85	1.93	4.35	1.77
hbonding	PM6-DH2	molecule_16.out	2.87	6.02	1.97	3.73	0.08
hbonding	PM6-DH2	molecule_163.out	0.84	5.58	1.93	3.78	2.39
hbonding	PM6-DH2	molecule_166.out	1.72	5.58	1.97	3.8	0.54
hbonding	PM6-DH2	molecule_167.out	1.63	5.56	1.87	4.02	0.64
hbonding	PM6-DH2	molecule_184.out	2.53	4.64	1.93	5.08	0.14
hbonding	PM6-DH2	molecule_190.out	2.32	5.7	1.9	4.47	0.2
hbonding	PM6-DH2	molecule_194.out	0.85	5.84	1.9	4.15	2.34
hbonding	PM6-DH2	molecule_197.out	1.32	4.83	1.94	5.02	1.06
hbonding	PM6-DH2	molecule_21.out	1.41	5.11	1.9	4.37	0.92
hbonding	PM6-DH2	molecule_220.out	2.22	4.66	1.94	5.07	0.24
hbonding	PM6-DH2	molecule_225.out	1.95	4.61	1.89	4.46	0.37
hbonding	PM6-DH2	molecule_234.out	2.52	4.62	1.91	4.41	0.14
hbonding	PM6-DH2	molecule_244.out	3.71	6.27	1.94	3.77	0.02
hbonding	PM6-DH2	molecule_248.out	1.98	4.81	1.92	4.46	0.35
hbonding	PM6-DH2	molecule_252.out	1.42	4.69	1.91	4.35	0.91
hbonding	PM6-DH2	molecule_258.out	1.11	4.91	1.94	4.48	1.52
hbonding	PM6-DH2	molecule_259.out	3.81	4.63	1.95	4.39	0.02
hbonding	PM6-DH2	molecule_270.out	2.22	4.62	1.94	4.46	0.23
hbonding	PM6-DH2	molecule_272.out	4.02	4.77	1.89	4.3	0.01
hbonding	PM6-DH2	molecule_276.out	0.33	4.78	1.91	4.46	5.62
hbonding	PM6-DH2	molecule_277.out	2.37	4.65	1.93	4.9	0.18
hbonding	PM6-DH2	molecule_279.out	3.21	4.56	1.93	4.49	0.04
hbonding	PM6-DH2	molecule_281.out	2.42	4.63	1.92	4.85	0.17
hbonding	PM6-DH2	molecule_295.out	2.75	4.59	1.92	4.35	0.1
hbonding	PM6-DH2	molecule_296.out	3.33	4.56	1.95	4.93	0.04
hbonding	PM6-DH2	molecule_30.out	1.3	5.27	1.93	4.47	1.1
hbonding	PM6-DH2	molecule_305.out	3.85	4.62	1.9	5.33	0.01
hbonding	PM6-DH2	molecule_307.out	3.73	4.65	1.94	5.45	0.02
hbonding	PM6-DH2	molecule_320.out	1.96	4.62	1.96	5.03	0.36
hbonding	PM6-DH2	molecule_323.out	1.38	4.9	1.91	5.04	0.96
hbonding	PM6-DH2	molecule_327.out	2.2	4.64	1.94	4.85	0.24
hbonding	PM6-DH2	molecule_330.out	2.73	4.61	1.9	5.11	0.1
hbonding	PM6-DH2	molecule_331.out	2.58	4.61	1.93	5.11	0.13
hbonding	PM6-DH2	molecule_332.out	2.14	4.64	1.93	5.12	0.27
hbonding	PM6-DH2	molecule_333.out	4.16	4.84	1.91	5.43	0.01
hbonding	PM6-DH2	molecule_344.out	1.56	5.88	1.91	4.08	0.72
hbonding	PM6-DH2	molecule_347.out	1.28	4.79	1.94	5.04	1.13
hbonding	PM6-DH2	molecule_352.out	1.91	4.65	1.94	4.63	0.39
hbonding	PM6-DH2	molecule_356.out	1.86	4.64	1.92	4.47	0.43
hbonding	PM6-DH2	molecule_358.out	4	4.88	1.89	4.39	0.01
hbonding	PM6-DH2	molecule_362.out	0	6.24	1.89	3.74	9.82
hbonding	PM6-DH2	molecule_373.out	3.52	4.66	1.91	4.55	0.03
hbonding	PM6-DH2	molecule_375.out	1.62	4.75	1.91	4.42	0.65
hbonding	PM6-DH2	molecule_381.out	3.22	4.63	1.93	4.28	0.04
hbonding	PM6-DH2	molecule_387.out	0.64	5.98	1.93	3.75	3.36
hbonding	PM6-DH2	molecule_390.out	1.88	6.49	1.92	3.74	0.41
hbonding	PM6-DH2	molecule_391.out	4.26	5.77	1.96	3.75	0.01
hbonding	PM6-DH2	molecule_394.out	0.59	6.04	1.9	3.58	3.64
hbonding	PM6-DH2	molecule_395.out	2.23	5.21	1.9	4.4	0.23
hbonding	PM6-DH2	molecule_401.out	3.7	4.32	1.92	4.54	0.02
hbonding	PM6-DH2	molecule_402.out	1.1	4.59	1.94	4.45	1.55
hbonding	PM6-DH2	molecule_412.out	0.64	5.92	1.9	3.45	3.36
hbonding	PM6-DH2	molecule_413.out	0.59	6.01	1.9	3.46	3.65
hbonding	PM6-DH2	molecule_414.out	2.5	5.9	1.89	3.51	0.15
hbonding	PM6-DH2	molecule_415.out	3.82	5.97	1.89	3.76	0.02
hbonding	PM6-DH2	molecule_417.out	0.71	5.64	1.92	3.57	2.95
hbonding	PM6-DH2	molecule_420.out	2.13	4.57	1.93	4.45	0.27
hbonding	PM6-DH2	molecule_425.out	2.41	4.74	1.94	5.06	0.17
hbonding	PM6-DH2	molecule_429.out	3.69	4.66	1.92	5.16	0.02
hbonding	PM6-DH2	molecule_436.out	1.15	5.81	1.92	4.25	1.42
hbonding	PM6-DH2	molecule_438.out	0.94	5.89	1.88	4.08	2.03
hbonding	PM6-DH2	molecule_449.out	1.8	4.92	1.91	5.01	0.48
hbonding	PM6-DH2	molecule_450.out	2.45	4.72	1.92	4.71	0.16
hbonding	PM6-DH2	molecule_453.out	1.65	5.01	1.93	5.07	0.61
hbonding	PM6-DH2	molecule_454.out	1.65	4.96	1.93	5.05	0.61
hbonding	PM6-DH2	molecule_456.out	4.31	4.62	1.93	5.47	0.01
hbonding	PM6-DH2	molecule_457.out	3.8	4.74	1.91	5.49	0.02
hbonding	PM6-DH2	molecule_465.out	0.87	5.85	1.96	4.42	2.28
hbonding	PM6-DH2	molecule_467.out	2.31	6.34	1.93	4.17	0.2
hbonding	PM6-DH2	molecule_470.out	4.23	4.72	1.91	5.32	0.01
hbonding	PM6-DH2	molecule_472.out	3.21	4.63	1.95	5.27	0.04
hbonding	PM6-DH2	molecule_474.out	4.73	4.75	1.94	5.3	0
hbonding	PM6-DH2	molecule_475.out	2.51	4.63	1.93	4.7	0.14
hbonding	PM6-DH2	molecule_476.out	4.27	4.71	1.94	4.74	0.01
hbonding	PM6-DH2	molecule_482.out	3.88	4.78	1.9	4.86	0.01
hbonding	PM6-DH2	molecule_483.out	3.54	4.91	1.89	4.8	0.03
hbonding	PM6-DH2	molecule_485.out	0.67	6.08	1.89	3.76	3.16
hbonding	PM6-DH2	molecule_487.out	1.63	6.23	1.91	3.51	0.63
hbonding	PM6-DH2	molecule_495.out	4.03	4.99	1.89	4.43	0.01
hbonding	PM6-DH2	molecule_496.out	3.88	4.97	1.97	4.49	0.01
hbonding	PM6-DH2	molecule_5.out	2.39	4.64	1.89	4.49	0.18
hbonding	PM6-DH2	molecule_507.out	1.86	4.68	1.9	4.4	0.43
hbonding	PM6-DH2	molecule_509.out	2.62	4.52	1.91	4.44	0.12
hbonding	PM6-DH2	molecule_526.out	2.61	4.63	1.95	4.47	0.12
hbonding	PM6-DH2	molecule_528.out	4.33	4.85	1.9	4.55	0.01
hbonding	PM6-DH2	molecule_533.out	0.77	4.62	1.94	4.48	2.69
hbonding	PM6-DH2	molecule_544.out	1.37	5.55	1.9	3.7	0.98
hbonding	PM6-DH2	molecule_545.out	2.17	4.57	1.92	4.45	0.26
hbonding	PM6-DH2	molecule_548.out	1.17	4.87	1.92	4.46	1.37
hbonding	PM6-DH2	molecule_550.out	2.59	4.75	1.93	5.05	0.13
hbonding	PM6-DH2	molecule_551.out	1.69	4.68	1.93	5.11	0.57
hbonding	PM6-DH2	molecule_56.out	1.67	4.76	1.91	5.1	0.6
hbonding	PM6-DH2	molecule_560.out	2.87	5.66	1.91	4.34	0.08
hbonding	PM6-DH2	molecule_565.out	0.84	5.87	1.93	4.44	2.41
hbonding	PM6-DH2	molecule_57.out	1.78	4.85	1.94	5.06	0.49
hbonding	PM6-DH2	molecule_570.out	3.06	4.59	1.91	5.05	0.06
hbonding	PM6-DH2	molecule_571.out	2.05	4.59	1.96	5.06	0.31
hbonding	PM6-DH2	molecule_574.out	1.86	4.95	1.9	5.02	0.43
hbonding	PM6-DH2	molecule_584.out	2.57	4.61	1.92	5.1	0.13
hbonding	PM6-DH2	molecule_589.out	2.89	5.81	1.93	4.5	0.08
hbonding	PM6-DH2	molecule_59.out	2.48	4.7	1.92	5.05	0.15
hbonding	PM6-DH2	molecule_596.out	1.52	4.63	1.96	5.04	0.76
hbonding	PM6-DH2	molecule_601.out	1.58	4.86	1.87	4.41	0.69
hbonding	PM6-DH2	molecule_602.out	3.98	4.65	1.93	4.54	0.01
hbonding	PM6-DH2	molecule_604.out	3.46	4.66	1.96	4.54	0.03
hbonding	PM6-DH2	molecule_605.out	2.8	4.61	1.94	4.4	0.09
hbonding	PM6-DH2	molecule_609.out	1.58	4.95	1.89	4.41	0.69
hbonding	PM6-DH2	molecule_616.out	0.61	6.03	1.92	3.75	3.55
hbonding	PM6-DH2	molecule_624.out	0.73	5.32	1.92	4.31	2.87
hbonding	PM6-DH2	molecule_65.out	0.83	5.87	1.94	4.45	2.41
hbonding	PM6-DH2	molecule_74.out	2.37	4.6	1.94	5.09	0.18
hbonding	PM6-DH2	molecule_75.out	2.11	4.64	1.94	5.02	0.28
hbonding	PM6-DH2	molecule_76.out	3.61	4.39	1.91	5.15	0.02
hbonding	PM6-DH2	molecule_83.out	2.78	4.89	1.9	5.11	0.09
hbonding	PM6-DH2	molecule_84.out	3.19	4.61	1.92	5.1	0.05
hbonding	PM7	molecule_104.out	1.06	5.24	1.91	4.37	2.79
hbonding	PM7	molecule_106.out	3.04	4.63	1.93	4.43	0.1
hbonding	PM7	molecule_108.out	2.1	4.98	1.91	4.41	0.48
hbonding	PM7	molecule_109.out	3.26	4.63	1.93	4.53	0.07
hbonding	PM7	molecule_110.out	0.06	5.85	1.91	3.72	14.81
hbonding	PM7	molecule_116.out	1.73	6.21	1.97	3.77	0.89
hbonding	PM7	molecule_122.out	1.71	5.11	1.87	4.34	0.92
hbonding	PM7	molecule_130.out	3.42	4.49	1.87	4.4	0.05
hbonding	PM7	molecule_141.out	1.71	5.61	1.9	3.73	0.93
hbonding	PM7	molecule_147.out	4.5	4.78	1.93	4.28	0.01
hbonding	PM7	molecule_148.out	3.93	4.75	1.91	4.3	0.02
hbonding	PM7	molecule_152.out	0	4.99	1.9	4.41	16.45
hbonding	PM7	molecule_164.out	1.76	5.84	1.91	3.72	0.85
hbonding	PM7	molecule_167.out	1.88	5.54	1.91	4.02	0.69
hbonding	PM7	molecule_173.out	1.55	4.79	1.91	4.33	1.21
hbonding	PM7	molecule_178.out	4.81	4.94	1.92	5.14	0
hbonding	PM7	molecule_19.out	3.4	5.89	1.94	3.59	0.05
hbonding	PM7	molecule_20.out	2.3	5.1	1.92	4.4	0.34
hbonding	PM7	molecule_202.out	4.16	4.51	1.92	5.13	0.01
hbonding	PM7	molecule_205.out	3.31	4.58	1.89	5.04	0.06
hbonding	PM7	molecule_209.out	3.45	4.62	1.92	5.09	0.05
hbonding	PM7	molecule_211.out	1.22	5.81	1.88	4.22	2.13
hbonding	PM7	molecule_223.out	1.67	4.96	1.9	5	0.99
hbonding	PM7	molecule_230.out	3.38	4.57	1.89	4.42	0.06
hbonding	PM7	molecule_233.out	2.34	5	1.93	4.53	0.32
hbonding	PM7	molecule_244.out	3.65	6.23	1.94	3.77	0.04
hbonding	PM7	molecule_246.out	2.21	4.6	2.05	4.44	0.4
hbonding	PM7	molecule_248.out	2.16	4.76	1.91	4.45	0.43
hbonding	PM7	molecule_249.out	2.75	4.6	1.92	4.44	0.16
hbonding	PM7	molecule_26.out	3.49	4.62	1.95	4.51	0.05
hbonding	PM7	molecule_262.out	0.49	5.84	1.91	3.46	7.25
hbonding	PM7	molecule_266.out	1.71	5.58	1.96	3.72	0.93
hbonding	PM7	molecule_272.out	4.12	4.96	1.86	4.64	0.02
hbonding	PM7	molecule_277.out	2.9	4.64	1.93	4.86	0.12
hbonding	PM7	molecule_295.out	4.88	4.55	1.93	4.85	0
hbonding	PM7	molecule_296.out	3.42	4.58	1.95	4.8	0.05
hbonding	PM7	molecule_298.out	3.4	4.84	1.91	4.89	0.05
hbonding	PM7	molecule_30.out	2.05	5.23	1.91	4.46	0.52
hbonding	PM7	molecule_301.out	3.88	4.64	1.94	5.48	0.02
hbonding	PM7	molecule_314.out	1.46	5.71	1.89	4.38	1.4
hbonding	PM7	molecule_315.out	4.03	6.08	1.9	4.29	0.02
hbonding	PM7	molecule_320.out	4.07	4.55	1.9	5.41	0.02
hbonding	PM7	molecule_324.out	3.8	4.73	1.92	5.35	0.03
hbonding	PM7	molecule_325.out	2.4	4.62	1.92	5	0.29
hbonding	PM7	molecule_329.out	2.57	4.96	1.92	5.05	0.22
hbonding	PM7	molecule_331.out	3.72	4.62	1.92	5.43	0.03
hbonding	PM7	molecule_334.out	4.29	4.61	1.92	5.47	0.01
hbonding	PM7	molecule_345.out	3.67	4.61	1.91	5.41	0.03
hbonding	PM7	molecule_356.out	2.64	4.62	1.91	4.55	0.19
hbonding	PM7	molecule_358.out	3.72	4.95	1.89	4.76	0.03
hbonding	PM7	molecule_366.out	1.32	6.08	1.91	3.49	1.77
hbonding	PM7	molecule_368.out	3.96	5.88	1.91	4.15	0.02
hbonding	PM7	molecule_373.out	3.32	4.59	1.91	4.56	0.06
hbonding	PM7	molecule_378.out	2.1	4.96	1.9	4.4	0.48
hbonding	PM7	molecule_38.out	0.96	5.95	1.88	3.48	3.28
hbonding	PM7	molecule_380.out	1.98	4.61	1.9	4.41	0.58
hbonding	PM7	molecule_384.out	4.64	4.75	1.89	4.45	0.01
hbonding	PM7	molecule_39.out	1.06	5.57	1.92	3.74	2.78
hbonding	PM7	molecule_391.out	4.24	6.41	1.94	3.73	0.01
hbonding	PM7	molecule_392.out	3.06	5.85	1.89	3.53	0.1
hbonding	PM7	molecule_394.out	4.24	6.4	1.91	3.72	0.01
hbonding	PM7	molecule_395.out	3.61	4.79	1.88	4.49	0.04
hbonding	PM7	molecule_400.out	2.57	4.61	1.89	4.56	0.22
hbonding	PM7	molecule_406.out	2.8	4.69	1.9	4.68	0.15
hbonding	PM7	molecule_408.out	3	4.61	1.93	4.49	0.11
hbonding	PM7	molecule_410.out	3.72	6.45	1.92	3.74	0.03
hbonding	PM7	molecule_414.out	2.5	5.98	1.91	3.5	0.25
hbonding	PM7	molecule_415.out	3.68	5.94	1.88	3.73	0.03
hbonding	PM7	molecule_416.out	3.01	6.08	1.96	3.55	0.11
hbonding	PM7	molecule_417.out	1.16	5.55	1.9	3.55	2.32
hbonding	PM7	molecule_426.out	2.19	4.65	1.93	5.08	0.41
hbonding	PM7	molecule_428.out	4.37	4.76	1.91	5.13	0.01
hbonding	PM7	molecule_437.out	1.22	5.84	1.93	4.44	2.13
hbonding	PM7	molecule_443.out	2.92	6.19	1.91	4.15	0.12
hbonding	PM7	molecule_445.out	2.2	4.58	1.89	5.01	0.41
hbonding	PM7	molecule_446.out	1.75	4.58	1.95	5.01	0.87
hbonding	PM7	molecule_457.out	3.86	4.72	1.91	5.46	0.02
hbonding	PM7	molecule_458.out	4.13	4.81	1.9	5.44	0.02
hbonding	PM7	molecule_465.out	3.23	6.25	1.96	4.16	0.07
hbonding	PM7	molecule_471.out	3.08	4.6	1.95	5.35	0.09
hbonding	PM7	molecule_473.out	3.9	4.78	1.91	5.32	0.02
hbonding	PM7	molecule_474.out	4.49	4.66	1.92	5.3	0.01
hbonding	PM7	molecule_477.out	4.16	4.67	1.92	4.76	0.01
hbonding	PM7	molecule_481.out	4.61	4.61	1.94	4.79	0.01
hbonding	PM7	molecule_484.out	3.69	4.8	1.92	4.77	0.03
hbonding	PM7	molecule_487.out	0.78	6.23	1.93	3.69	4.43
hbonding	PM7	molecule_490.out	2.74	6.66	1.89	3.73	0.16
hbonding	PM7	molecule_493.out	2.69	6.07	1.9	3.62	0.18
hbonding	PM7	molecule_496.out	3.7	4.9	1.97	4.47	0.03
hbonding	PM7	molecule_505.out	1.96	4.61	1.91	4.43	0.61
hbonding	PM7	molecule_516.out	4.65	5.64	1.98	3.75	0.01
hbonding	PM7	molecule_522.out	1.53	5.17	1.92	4.35	1.25
hbonding	PM7	molecule_527.out	4.84	4.58	1.91	4.53	0
hbonding	PM7	molecule_529.out	4.4	4.59	1.95	4.52	0.01
hbonding	PM7	molecule_536.out	3.47	6.23	1.96	3.74	0.05
hbonding	PM7	molecule_539.out	1.81	5.54	1.9	3.65	0.78
hbonding	PM7	molecule_540.out	2.5	5.54	1.9	3.82	0.25
hbonding	PM7	molecule_545.out	3.02	4.54	1.88	4.49	0.1
hbonding	PM7	molecule_546.out	1.83	4.68	1.91	4.55	0.75
hbonding	PM7	molecule_547.out	2.16	4.71	1.9	4.5	0.44
hbonding	PM7	molecule_548.out	2.24	4.81	1.89	4.5	0.38
hbonding	PM7	molecule_555.out	2.74	4.68	1.93	5.04	0.16
hbonding	PM7	molecule_56.out	2.62	4.62	1.93	4.87	0.2
hbonding	PM7	molecule_564.out	2.2	5.72	1.9	4.44	0.41
hbonding	PM7	molecule_565.out	2.61	5.72	1.89	4.37	0.21
hbonding	PM7	molecule_573.out	2.61	4.79	1.91	5.03	0.21
hbonding	PM7	molecule_58.out	2.08	4.95	1.91	5	0.5
hbonding	PM7	molecule_584.out	1.99	4.96	1.93	5.06	0.58
hbonding	PM7	molecule_594.out	2.91	5.84	1.92	4.41	0.12
hbonding	PM7	molecule_602.out	4.74	4.7	1.91	4.54	0
hbonding	PM7	molecule_604.out	4.5	4.68	1.92	4.54	0.01
hbonding	PM7	molecule_610.out	1.05	6	1.89	3.73	2.81
hbonding	PM7	molecule_616.out	1.54	6.1	1.95	3.72	1.23
hbonding	PM7	molecule_617.out	1.2	5.82	1.91	3.78	2.17
hbonding	PM7	molecule_62.out	1.4	5.79	1.93	4.33	1.57
hbonding	PM7	molecule_65.out	1.18	5.87	1.94	4.41	2.26
hbonding	PM7	molecule_77.out	1.53	4.75	1.95	5.02	1.26
hbonding	PM7	molecule_81.out	3.07	4.61	1.92	5.09	0.09
hbonding	PM7	molecule_83.out	3.11	4.87	1.9	5.08	0.09
hbonding	PM7	molecule_89.out	1.58	5.76	1.91	4.25	1.14
hbonding	PM7	molecule_90.out	2.33	5.68	1.88	4.35	0.33
hbonding	PM7	molecule_92.out	1.35	5.87	1.91	4.06	1.71
hbonding	PM7	molecule_95.out	2.45	4.82	1.87	5.01	0.27
hbonding	PM7 Precise	molecule_106.out	2.09	4.98	1.9	4.41	0.78
hbonding	PM7 Precise	molecule_110.out	0.05	5.86	1.91	3.72	23.98
hbonding	PM7 Precise	molecule_111.out	1.2	5.79	1.91	3.81	3.52
hbonding	PM7 Precise	molecule_130.out	3.42	4.48	1.87	4.39	0.08
hbonding	PM7 Precise	molecule_132.out	0	4.99	1.9	4.41	26.3
hbonding	PM7 Precise	molecule_139.out	1.06	5.57	1.92	3.75	4.46
hbonding	PM7 Precise	molecule_160.out	1.9	5.65	1.9	3.74	1.09
hbonding	PM7 Precise	molecule_173.out	1.54	4.77	1.92	4.34	1.97
hbonding	PM7 Precise	molecule_175.out	2.39	4.62	1.92	5.01	0.47
hbonding	PM7 Precise	molecule_176.out	2.32	4.63	1.94	5.04	0.53
hbonding	PM7 Precise	molecule_179.out	1.65	4.91	1.91	5.02	1.63
hbonding	PM7 Precise	molecule_19.out	3.44	5.89	1.94	3.58	0.08
hbonding	PM7 Precise	molecule_195.out	1.52	4.78	1.93	5.01	2.03
hbonding	PM7 Precise	molecule_216.out	1.21	5.81	1.87	4.21	3.42
hbonding	PM7 Precise	molecule_217.out	2.44	6.04	1.93	3.86	0.43
hbonding	PM7 Precise	molecule_240.out	1.42	6.09	1.97	3.65	2.41
hbonding	PM7 Precise	molecule_244.out	3.66	6.23	1.94	3.77	0.06
hbonding	PM7 Precise	molecule_250.out	3.14	4.58	1.92	4.34	0.13
hbonding	PM7 Precise	molecule_264.out	2.49	5.96	1.9	3.49	0.4
hbonding	PM7 Precise	molecule_277.out	2.89	4.64	1.92	4.87	0.2
hbonding	PM7 Precise	molecule_292.out	1.02	5.93	1.91	3.46	4.74
hbonding	PM7 Precise	molecule_296.out	3.38	4.58	1.92	4.86	0.09
hbonding	PM7 Precise	molecule_299.out	3.37	4.89	1.93	4.88	0.09
hbonding	PM7 Precise	molecule_305.out	3.71	4.61	1.92	5.41	0.05
hbonding	PM7 Precise	molecule_324.out	3.07	4.59	1.95	5.36	0.15
hbonding	PM7 Precise	molecule_332.out	3.85	4.68	1.92	5.46	0.04
hbonding	PM7 Precise	molecule_344.out	1.57	5.73	1.9	4.28	1.89
hbonding	PM7 Precise	molecule_356.out	2.63	4.62	1.91	4.56	0.32
hbonding	PM7 Precise	molecule_357.out	3.67	4.84	1.91	4.77	0.06
hbonding	PM7 Precise	molecule_359.out	2.99	4.62	1.92	4.5	0.17
hbonding	PM7 Precise	molecule_36.out	1.69	5.59	1.94	3.73	1.54
hbonding	PM7 Precise	molecule_370.out	3.6	4.8	1.89	4.47	0.06
hbonding	PM7 Precise	molecule_372.out	1.74	4.94	1.94	4.43	1.42
hbonding	PM7 Precise	molecule_373.out	3.31	4.58	1.91	4.55	0.1
hbonding	PM7 Precise	molecule_380.out	1.96	4.61	1.91	4.43	0.97
hbonding	PM7 Precise	molecule_384.out	4.65	4.75	1.89	4.45	0.01
hbonding	PM7 Precise	molecule_404.out	4.24	4.61	1.95	4.51	0.02
hbonding	PM7 Precise	molecule_406.out	2.77	4.69	1.9	4.59	0.25
hbonding	PM7 Precise	molecule_409.out	3.08	4.62	1.93	4.49	0.15
hbonding	PM7 Precise	molecule_420.out	2.89	4.56	1.91	4.5	0.2
hbonding	PM7 Precise	molecule_425.out	1.7	4.6	1.95	5.01	1.5
hbonding	PM7 Precise	molecule_437.out	1.17	5.86	1.94	4.41	3.65
hbonding	PM7 Precise	molecule_475.out	4.71	4.6	1.93	4.83	0.01
hbonding	PM7 Precise	molecule_490.out	2.39	6.24	1.9	3.75	0.47
hbonding	PM7 Precise	molecule_497.out	3.67	4.82	1.97	4.49	0.06
hbonding	PM7 Precise	molecule_507.out	2.32	4.76	1.89	4.37	0.53
hbonding	PM7 Precise	molecule_516.out	4.66	5.64	1.98	3.75	0.01
hbonding	PM7 Precise	molecule_523.out	1.06	5.25	1.91	4.36	4.46
hbonding	PM7 Precise	molecule_526.out	2.89	4.65	1.92	4.48	0.2
hbonding	PM7 Precise	molecule_53.out	1.99	4.94	1.93	5.05	0.93
hbonding	PM7 Precise	molecule_536.out	3.52	6.24	1.95	3.74	0.07
hbonding	PM7 Precise	molecule_546.out	1.81	4.62	1.94	4.56	1.25
hbonding	PM7 Precise	molecule_557.out	2.68	5.02	1.92	4.86	0.29
hbonding	PM7 Precise	molecule_589.out	2.91	5.82	1.9	4.46	0.2
hbonding	PM7 Precise	molecule_84.out	3.43	4.61	1.92	5.09	0.08
hbonding	B3LYP	molecule_105.log	3.69	4.69	1.9	4.4	0.04
hbonding	B3LYP	molecule_136.log	0.02	6.13	1.92	3.63	19.39
hbonding	B3LYP	molecule_142.log	3.23	5.66	1.92	3.77	0.09
hbonding	B3LYP	molecule_148.log	2.06	4.63	1.94	4.39	0.63
hbonding	B3LYP	molecule_150.log	2.28	4.67	1.91	4.44	0.44
hbonding	B3LYP	molecule_164.log	1.36	5.62	1.94	3.76	2.03
hbonding	B3LYP	molecule_165.log	2.85	5.64	1.88	3.78	0.17
hbonding	B3LYP	molecule_170.log	2.58	4.64	1.89	4.4	0.26
hbonding	B3LYP	molecule_175.log	3.38	4.67	1.91	5.06	0.07
hbonding	B3LYP	molecule_179.log	2.76	4.92	1.93	5.04	0.19
hbonding	B3LYP	molecule_183.log	3.79	4.69	1.93	5.07	0.03
hbonding	B3LYP	molecule_211.log	3.26	5.85	1.93	4.32	0.08
hbonding	B3LYP	molecule_220.log	2.78	4.89	1.88	5.06	0.19
hbonding	B3LYP	molecule_225.log	3.78	4.69	1.92	4.47	0.03
hbonding	B3LYP	molecule_227.log	4.03	4.64	1.92	4.43	0.02
hbonding	B3LYP	molecule_228.log	4.24	4.7	1.93	4.48	0.02
hbonding	B3LYP	molecule_234.log	2.04	4.53	1.91	4.42	0.65
hbonding	B3LYP	molecule_241.log	1.08	6.11	1.91	3.6	3.29
hbonding	B3LYP	molecule_253.log	3.56	5.01	1.92	4.77	0.05
hbonding	B3LYP	molecule_269.log	1.46	6.12	1.94	3.53	1.74
hbonding	B3LYP	molecule_271.log	4.37	4.65	1.96	4.76	0.01
hbonding	B3LYP	molecule_275.log	1.16	4.66	1.91	4.43	2.85
hbonding	B3LYP	molecule_286.log	2.8	6.1	1.88	3.55	0.18
hbonding	B3LYP	molecule_295.log	3.17	4.63	1.89	4.88	0.1
hbonding	B3LYP	molecule_296.log	3.96	4.63	1.93	4.86	0.03
hbonding	B3LYP	molecule_298.log	2.47	4.66	1.93	4.86	0.32
hbonding	B3LYP	molecule_308.log	3.81	4.68	1.93	5.45	0.03
hbonding	B3LYP	molecule_343.log	2.8	6.33	1.95	4.24	0.18
hbonding	B3LYP	molecule_348.log	3.54	4.66	1.94	5.4	0.05
hbonding	B3LYP	molecule_357.log	4.8	4.73	1.88	4.87	0.01
hbonding	B3LYP	molecule_360.log	2.89	6.73	1.88	3.76	0.15
hbonding	B3LYP	molecule_372.log	3.71	4.64	1.91	4.8	0.04
hbonding	B3LYP	molecule_375.log	3.67	4.69	1.91	4.81	0.04
hbonding	B3LYP	molecule_395.log	1.99	4.64	1.88	4.69	0.71
hbonding	B3LYP	molecule_415.log	2.95	6.52	1.89	3.77	0.14
hbonding	B3LYP	molecule_451.log	3.35	4.67	1.92	5.45	0.07
hbonding	B3LYP	molecule_452.log	4.35	4.64	1.93	5.43	0.01
hbonding	B3LYP	molecule_460.log	4.02	6.26	1.88	4.31	0.02
hbonding	B3LYP	molecule_461.log	3.21	6.34	1.93	4.24	0.09
hbonding	B3LYP	molecule_47.log	3.65	4.64	1.93	4.4	0.04
hbonding	B3LYP	molecule_470.log	3.08	4.66	1.88	5.41	0.11
hbonding	B3LYP	molecule_484.log	3.01	4.72	1.93	4.81	0.13
hbonding	B3LYP	molecule_498.log	2.15	4.66	1.93	4.76	0.54
hbonding	B3LYP	molecule_509.log	2.82	4.75	1.92	4.38	0.18
hbonding	B3LYP	molecule_52.log	3.81	4.79	1.91	5.09	0.03
hbonding	B3LYP	molecule_529.log	0.68	4.65	1.93	4.48	6.44
hbonding	B3LYP	molecule_535.log	4.04	5.69	1.88	3.77	0.02
hbonding	B3LYP	molecule_542.log	0.15	6.03	1.9	3.51	15.7
hbonding	B3LYP	molecule_545.log	3.77	4.69	1.88	4.5	0.04
hbonding	B3LYP	molecule_546.log	4.63	4.52	1.93	4.4	0.01
hbonding	B3LYP	molecule_548.log	3.56	4.65	1.94	4.41	0.05
hbonding	B3LYP	molecule_550.log	3.28	4.77	1.92	5.1	0.08
hbonding	B3LYP	molecule_552.log	4.15	4.64	1.92	5.05	0.02
hbonding	B3LYP	molecule_557.log	2.97	4.76	1.93	5.09	0.14
hbonding	B3LYP	molecule_569.log	2.74	5.88	1.95	4.44	0.2
hbonding	B3LYP	molecule_585.log	3.76	5.82	1.88	4.53	0.04
hbonding	B3LYP	molecule_595.log	2.76	4.65	1.88	5.04	0.19
hbonding	B3LYP	molecule_599.log	3.04	4.67	1.94	5.02	0.12
hbonding	B3LYP	molecule_617.log	2.56	6.05	1.94	3.66	0.27
hbonding	B3LYP	molecule_619.log	0	6.2	1.94	3.56	20.09
hbonding	B3LYP	molecule_620.log	1.79	4.9	1.88	4.4	0.99
hbonding	B3LYP	molecule_622.log	3.05	4.79	1.87	4.43	0.12
hbonding	B3LYP	molecule_624.log	1.59	4.92	1.92	4.38	1.38
hbonding	B3LYP	molecule_65.log	3.72	5.77	1.89	4.39	0.04
hbonding	B3LYP	molecule_8.log	0.07	4.66	1.94	4.45	17.92
hbonding	B3LYP	molecule_91.log	3.24	5.87	1.93	4.44	0.09
hbonding	B3LYP	molecule_93.log	2.12	5.86	1.95	4.19	0.57
hbonding	wB97xD	molecule_100.log	2.29	4.65	1.87	4.4	0.73
hbonding	wB97xD	molecule_105.log	3.89	4.67	1.91	4.36	0.05
hbonding	wB97xD	molecule_112.log	3.13	6.03	1.94	3.66	0.18
hbonding	wB97xD	molecule_117.log	0.72	6.11	1.9	3.6	10.22
hbonding	wB97xD	molecule_130.log	2.22	4.53	1.88	4.41	0.82
hbonding	wB97xD	molecule_142.log	3.9	5.66	1.91	3.73	0.05
hbonding	wB97xD	molecule_15.log	3.26	5.99	1.89	3.76	0.14
hbonding	wB97xD	molecule_155.log	2.32	4.66	1.92	4.44	0.69
hbonding	wB97xD	molecule_157.log	0	4.64	1.93	4.44	34.24
hbonding	wB97xD	molecule_16.log	1.61	6.05	1.92	3.57	2.27
hbonding	wB97xD	molecule_171.log	4.26	4.63	1.92	4.36	0.03
hbonding	wB97xD	molecule_192.log	4	5.84	1.92	4.31	0.04
hbonding	wB97xD	molecule_225.log	3.82	4.67	1.91	4.45	0.05
hbonding	wB97xD	molecule_24.log	2.03	4.65	1.93	4.4	1.13
hbonding	wB97xD	molecule_240.log	4.5	6.24	1.88	3.76	0.02
hbonding	wB97xD	molecule_247.log	4.35	4.63	1.91	4.43	0.02
hbonding	wB97xD	molecule_265.log	3.3	6.52	1.89	3.76	0.13
hbonding	wB97xD	molecule_273.log	2.49	4.65	1.93	4.75	0.52
hbonding	wB97xD	molecule_283.log	3.41	5.01	1.92	4.72	0.11
hbonding	wB97xD	molecule_295.log	3.9	4.63	1.89	4.85	0.05
hbonding	wB97xD	molecule_297.log	4.69	4.63	1.92	4.83	0.01
hbonding	wB97xD	molecule_298.log	3.16	4.64	1.93	4.83	0.17
hbonding	wB97xD	molecule_307.log	4.16	4.67	1.93	5.43	0.03
hbonding	wB97xD	molecule_313.log	3.47	6.31	1.94	4.23	0.1
hbonding	wB97xD	molecule_316.log	3.93	6.33	1.91	4.22	0.04
hbonding	wB97xD	molecule_320.log	3.7	4.65	1.87	5.4	0.07
hbonding	wB97xD	molecule_335.log	4.67	6.26	1.89	4.28	0.01
hbonding	wB97xD	molecule_34.log	1.19	4.64	1.92	4.47	4.63
hbonding	wB97xD	molecule_348.log	4.15	4.65	1.94	5.4	0.03
hbonding	wB97xD	molecule_359.log	3.3	4.69	1.92	4.75	0.13
hbonding	wB97xD	molecule_364.log	3.53	6.7	1.88	3.75	0.09
hbonding	wB97xD	molecule_375.log	3.91	4.67	1.91	4.75	0.05
hbonding	wB97xD	molecule_376.log	4.97	4.73	1.89	4.83	0.01
hbonding	wB97xD	molecule_389.log	1.98	6.11	1.93	3.52	1.22
hbonding	wB97xD	molecule_397.log	4.1	4.62	1.9	4.77	0.03
hbonding	wB97xD	molecule_411.log	3.4	6.08	1.9	3.54	0.11
hbonding	wB97xD	molecule_412.log	0.45	6.01	1.89	3.51	16.02
hbonding	wB97xD	molecule_44.log	1.89	5.62	1.93	3.71	1.42
hbonding	wB97xD	molecule_450.log	3.56	4.66	1.92	5.43	0.09
hbonding	wB97xD	molecule_46.log	3.14	4.63	1.88	4.37	0.17
hbonding	wB97xD	molecule_475.log	2.5	4.64	1.86	4.72	0.51
hbonding	wB97xD	molecule_48.log	2.6	4.62	1.93	4.36	0.43
hbonding	wB97xD	molecule_485.log	3.53	6.7	1.88	3.75	0.09
hbonding	wB97xD	molecule_506.log	1.04	4.65	1.91	4.43	5.98
hbonding	wB97xD	molecule_508.log	3.06	4.74	1.92	4.36	0.2
hbonding	wB97xD	molecule_521.log	3.41	4.76	1.88	4.44	0.11
hbonding	wB97xD	molecule_528.log	4.6	4.68	1.94	4.47	0.01
hbonding	wB97xD	molecule_53.log	3.13	4.69	1.93	5.08	0.18
hbonding	wB97xD	molecule_540.log	4.41	5.86	1.89	3.76	0.02
hbonding	wB97xD	molecule_545.log	4.15	4.67	1.87	4.48	0.03
hbonding	wB97xD	molecule_548.log	4.05	4.64	1.93	4.37	0.04
hbonding	wB97xD	molecule_551.log	4.82	4.63	1.91	5.04	0.01
hbonding	wB97xD	molecule_556.log	3.53	4.71	1.92	5.08	0.09
hbonding	wB97xD	molecule_564.log	3.42	5.86	1.94	4.42	0.11
hbonding	wB97xD	molecule_565.log	4.42	5.8	1.88	4.47	0.02
hbonding	wB97xD	molecule_59.log	4.14	4.68	1.93	5.06	0.03
hbonding	wB97xD	molecule_595.log	3.38	4.64	1.87	5.03	0.12
hbonding	wB97xD	molecule_599.log	3.58	4.65	1.94	5.02	0.08
hbonding	wB97xD	molecule_60.log	4.32	5.77	1.89	4.41	0.02
hbonding	wB97xD	molecule_610.log	0.48	6.17	1.94	3.54	15.31
hbonding	wB97xD	molecule_63.log	2.7	5.86	1.94	4.16	0.37
hbonding	wB97xD	molecule_71.log	3.45	4.81	1.87	5.05	0.1
hbonding	wB97xD	molecule_92.log	3.98	5.85	1.92	4.39	0.04
hbonding	wB97xD	molecule_97.log	4.46	4.73	1.9	5.08	0.02
hbonding	wB97xD	molecule_98.log	3.38	4.83	1.93	5.04	0.12
hbonding	M06-2X	molecule_114.log	1.69	6.06	1.9	3.51	3.12
hbonding	M06-2X	molecule_122.log	4.39	4.84	1.85	4.44	0.03
hbonding	M06-2X	molecule_132.log	0	4.66	1.93	4.44	53.24
hbonding	M06-2X	molecule_15.log	3.9	6.02	1.89	3.75	0.07
hbonding	M06-2X	molecule_167.log	4.93	5.55	1.9	3.83	0.02
hbonding	M06-2X	molecule_17.log	0.68	6.13	1.93	3.49	17.07
hbonding	M06-2X	molecule_170.log	4.02	4.63	1.87	4.33	0.06
hbonding	M06-2X	molecule_174.log	3.51	4.64	1.93	4.32	0.14
hbonding	M06-2X	molecule_223.log	4.39	4.8	1.93	5.04	0.03
hbonding	M06-2X	molecule_231.log	4.49	4.66	1.91	4.4	0.03
hbonding	M06-2X	molecule_234.log	2.5	4.53	1.87	4.39	0.79
hbonding	M06-2X	molecule_237.log	2.32	6.02	1.92	3.55	1.07
hbonding	M06-2X	molecule_290.log	3.68	6.54	1.89	3.76	0.11
hbonding	M06-2X	molecule_292.log	4.2	6.09	1.89	3.52	0.05
hbonding	M06-2X	molecule_296.log	4.49	4.61	1.88	4.82	0.03
hbonding	M06-2X	molecule_30.log	2.84	4.65	1.89	4.44	0.45
hbonding	M06-2X	molecule_313.log	4.21	6.33	1.94	4.2	0.04
hbonding	M06-2X	molecule_320.log	4.49	4.64	1.87	5.41	0.03
hbonding	M06-2X	molecule_326.log	4.36	4.65	1.91	5.43	0.04
hbonding	M06-2X	molecule_351.log	4.82	4.61	1.9	4.73	0.02
hbonding	M06-2X	molecule_356.log	4.4	4.67	1.91	4.69	0.03
hbonding	M06-2X	molecule_357.log	4.49	4.98	1.89	4.63	0.03
hbonding	M06-2X	molecule_378.log	3.62	4.67	1.92	4.69	0.12
hbonding	M06-2X	molecule_382.log	3.45	5.01	1.91	4.67	0.16
hbonding	M06-2X	molecule_396.log	3.01	4.64	1.86	4.72	0.34
hbonding	M06-2X	molecule_419.log	2.55	6.11	1.93	3.49	0.73
hbonding	M06-2X	molecule_423.log	3.78	4.6	1.93	4.8	0.09
hbonding	M06-2X	molecule_429.log	4.99	4.65	1.93	5.41	0.01
hbonding	M06-2X	molecule_437.log	4.97	6.33	1.9	4.2	0.01
hbonding	M06-2X	molecule_44.log	2.63	5.61	1.93	3.69	0.64
hbonding	M06-2X	molecule_454.log	4.89	4.66	1.92	5.44	0.02
hbonding	M06-2X	molecule_478.log	2.93	4.64	1.93	4.72	0.38
hbonding	M06-2X	molecule_490.log	3.94	6.63	1.88	3.75	0.07
hbonding	M06-2X	molecule_494.log	3.93	6.57	1.89	3.74	0.07
hbonding	M06-2X	molecule_50.log	4.6	4.65	1.91	5.05	0.02
hbonding	M06-2X	molecule_508.log	3.66	4.68	1.92	4.37	0.11
hbonding	M06-2X	molecule_525.log	1.4	4.64	1.91	4.43	5.03
hbonding	M06-2X	molecule_533.log	2.27	4.8	1.91	4.45	1.17
hbonding	M06-2X	molecule_537.log	0.83	5.99	1.89	3.49	13.27
hbonding	M06-2X	molecule_545.log	4.9	4.66	1.87	4.44	0.02
hbonding	M06-2X	molecule_546.log	5	4.57	1.92	4.34	0.01
hbonding	M06-2X	molecule_548.log	4.95	4.58	1.93	4.32	0.01
hbonding	M06-2X	molecule_558.log	4	4.66	1.92	5.07	0.06
hbonding	M06-2X	molecule_564.log	4.3	5.87	1.94	4.39	0.04
hbonding	M06-2X	molecule_570.log	4.38	4.64	1.87	5.03	0.03
hbonding	M06-2X	molecule_603.log	2.79	4.64	1.92	4.42	0.48
hbonding	M06-2X	molecule_606.log	4.68	4.67	1.91	4.36	0.02
hbonding	M06-2X	molecule_617.log	4.03	6	1.94	3.67	0.06
hbonding	M06-2X	molecule_620.log	3.14	4.63	1.86	4.41	0.27
hbonding	M06-2X	molecule_68.log	3.58	5.87	1.94	4.15	0.13
hbonding	M06-2X	molecule_71.log	4.41	4.78	1.87	5.05	0.03
hbonding	M06-2X	molecule_81.log	4.5	4.66	1.91	5.08	0.03
linear	PM6-DH2	butane_1.out	1.22	5.32	1.87	5	4.5
linear	PM6-DH2	butane_11.out	0.58	5.05	1.88	5.65	13.09
linear	PM6-DH2	butane_13.out	0	6.69	1.89	4.53	34.91
linear	PM6-DH2	butane_15.out	0.56	5.04	1.87	5.63	13.56
linear	PM6-DH2	butane_2.out	0.56	6.74	1.88	3.72	13.53
linear	PM6-DH2	butane_21.out	1.6	4.57	1.88	5.19	2.37
linear	PM6-DH2	butane_3.out	0.56	6.77	1.88	3.7	13.58
linear	PM6-DH2	butane_4.out	1.23	5.32	1.89	4.99	4.44
linear	PM6-DH2	butane_5.out	4.37	4.28	1.89	4.99	0.02
linear	PM7	butane_1.out	1.28	5.44	1.88	4.93	4.31
linear	PM7	butane_10.out	0.62	5.06	1.89	5.63	13.13
linear	PM7	butane_15.out	0.61	5.05	1.89	5.61	13.41
linear	PM7	butane_18.out	0	6.66	1.89	4.53	37.42
linear	PM7	butane_2.out	0.62	6.65	1.89	3.81	13.27
linear	PM7	butane_21.out	2.2	4.54	1.88	5.31	0.93
linear	PM7	butane_24.out	1.29	5.41	1.89	4.93	4.26
linear	PM7	butane_3.out	0.62	6.77	1.9	3.64	13.26
linear	PM7 Precise	butane_1.out	1.28	5.49	1.89	4.91	4.28
linear	PM7 Precise	butane_10.out	0.61	5.02	1.88	5.62	13.28
linear	PM7 Precise	butane_11.out	0.61	5.02	1.88	5.62	13.28
linear	PM7 Precise	butane_12.out	0	6.65	1.88	4.53	37.03
linear	PM7 Precise	butane_2.out	0.61	6.69	1.88	3.78	13.28
linear	PM7 Precise	butane_20.out	1.28	5.49	1.89	4.91	4.28
linear	PM7 Precise	butane_21.out	2	4.6	1.88	5.28	1.28
linear	PM7 Precise	butane_3.out	0.61	6.69	1.88	3.78	13.28
linear	B3LYP	butane_14.log	0.86	5.11	1.88	5.68	11.38
linear	B3LYP	butane_15.log	0.86	5.11	1.88	5.68	11.38
linear	B3LYP	butane_18.log	0	6.76	1.88	4.51	48.4
linear	B3LYP	butane_20.log	1.68	4.94	1.89	5.14	2.87
linear	B3LYP	butane_21.log	3.36	4.56	1.88	5.27	0.17
linear	B3LYP	butane_23.log	0.86	6.86	1.9	3.52	11.38
linear	B3LYP	butane_3.log	0.86	6.86	1.9	3.52	11.38
linear	B3LYP	butane_5.log	1.68	4.94	1.89	5.14	2.87
linear	B3LYP	butane_9.log	3.36	4.69	1.88	5.33	0.17
linear	wB97xD	butane_1.log	0.63	4.64	1.88	5.13	10.22
linear	wB97xD	butane_10.log	0.52	5.05	1.88	5.68	12.24
linear	wB97xD	butane_11.log	0.52	5.05	1.88	5.68	12.24
linear	wB97xD	butane_18.log	0	6.72	1.88	4.51	29.6
linear	wB97xD	butane_21.log	2.44	4.67	1.88	5.25	0.49
linear	wB97xD	butane_22.log	0.52	6.86	1.89	3.52	12.24
linear	wB97xD	butane_4.log	0.63	4.64	1.88	5.13	10.22
linear	wB97xD	butane_7.log	0.52	6.86	1.89	3.52	12.24
linear	wB97xD	butane_9.log	2.44	4.67	1.88	5.25	0.49
linear	M06-2X	butane_1.log	0.63	4.63	1.88	5.11	10.09
linear	M06-2X	butane_16.log	0.5	4.98	1.88	5.69	12.45
linear	M06-2X	butane_17.log	0	6.7	1.88	4.51	29.11
linear	M06-2X	butane_19.log	0.5	4.98	1.88	5.69	12.45
linear	M06-2X	butane_21.log	2.48	4.65	1.88	5.21	0.45
linear	M06-2X	butane_22.log	0.5	6.84	1.89	3.52	12.45
linear	M06-2X	butane_3.log	0.5	6.84	1.89	3.52	12.45
linear	M06-2X	butane_4.log	0.63	4.63	1.88	5.11	10.09
linear	M06-2X	butane_9.log	2.48	4.7	1.89	5.13	0.45
nontrivial	PM6-DH2	molecule_1.out	2.71	7.53	3.31	10.73	0.63
nontrivial	PM6-DH2	molecule_11.out	2.63	7.56	3.25	10.68	0.73
nontrivial	PM6-DH2	molecule_13.out	1.38	7.55	3.12	10.67	5.97
nontrivial	PM6-DH2	molecule_14.out	0	7.48	3.16	10.73	60.45
nontrivial	PM6-DH2	molecule_2.out	0.94	7.76	3.21	10.76	12.34
nontrivial	PM6-DH2	molecule_23.out	2.19	7.7	3.72	10.68	1.53
nontrivial	PM6-DH2	molecule_24.out	1.3	7.45	3.64	10.73	6.84
nontrivial	PM6-DH2	molecule_4.out	1.11	7.18	3.33	10.63	9.29
nontrivial	PM6-DH2	molecule_9.out	1.97	7.04	3.21	10.71	2.21
nontrivial	PM7	molecule_1.out	3.66	7.53	3.42	10.73	0.16
nontrivial	PM7	molecule_11.out	2.53	7.85	3.52	10.58	1.1
nontrivial	PM7	molecule_12.out	1.08	7.66	3.56	10.58	12.48
nontrivial	PM7	molecule_19.out	0	7.84	3.58	10.59	77.25
nontrivial	PM7	molecule_2.out	1.76	8.02	3.56	10.64	3.97
nontrivial	PM7	molecule_23.out	2.97	7.99	3.76	10.58	0.52
nontrivial	PM7	molecule_24.out	2.53	7.82	3.77	10.66	1.1
nontrivial	PM7	molecule_9.out	1.85	7.51	3.55	10.72	3.42
nontrivial	PM7 Precise	molecule_11.out	2.7	7.6	3.58	10.48	0.84
nontrivial	PM7 Precise	molecule_13.out	1.11	7.34	3.57	10.54	12.34
nontrivial	PM7 Precise	molecule_14.out	0	7.63	3.59	10.53	79.18
nontrivial	PM7 Precise	molecule_2.out	1.84	8.05	3.53	10.62	3.57
nontrivial	PM7 Precise	molecule_23.out	3.01	7.93	3.68	10.51	0.51
nontrivial	PM7 Precise	molecule_24.out	2.61	7.83	3.76	10.58	0.97
nontrivial	PM7 Precise	molecule_6.out	3.72	7.66	3.49	10.67	0.15
nontrivial	PM7 Precise	molecule_9.out	2.07	7.82	3.63	10.73	2.43
nontrivial	B3LYP	molecule_1.log	4.54	6.76	4.13	10.61	0.04
nontrivial	B3LYP	molecule_11.log	2.3	7.26	3.88	10.66	1.73
nontrivial	B3LYP	molecule_13.log	1.82	6.82	3.67	10.62	3.82
nontrivial	B3LYP	molecule_14.log	0	6.95	4.02	10.61	81.92
nontrivial	B3LYP	molecule_18.log	2.02	7.18	3.73	10.66	2.76
nontrivial	B3LYP	molecule_23.log	2.51	7	3.57	10.64	1.2
nontrivial	B3LYP	molecule_24.log	2.56	6.83	4.06	10.58	1.11
nontrivial	B3LYP	molecule_7.log	1.48	6.68	3.78	10.62	6.85
nontrivial	B3LYP	molecule_9.log	2.95	5.87	4.14	10.45	0.57
nontrivial	wB97xD	molecule_11.log	2.33	7.66	3.75	10.67	1.84
nontrivial	wB97xD	molecule_12.log	2.49	7.24	3.68	10.66	1.41
nontrivial	wB97xD	molecule_18.log	2.41	7.74	3.68	10.66	1.62
nontrivial	wB97xD	molecule_19.log	0	7.38	4.01	10.66	93.14
nontrivial	wB97xD	molecule_2.log	2.79	7.34	3.79	10.68	0.86
nontrivial	wB97xD	molecule_23.log	3.44	7.47	3.54	10.66	0.29
nontrivial	wB97xD	molecule_24.log	3.07	7.05	4.04	10.64	0.53
nontrivial	wB97xD	molecule_4.log	4.29	7.1	4.16	10.44	0.07
nontrivial	wB97xD	molecule_9.log	3.53	5.94	4.15	10.55	0.24
nontrivial	M06-2X	molecule_11.log	2.68	7.61	3.74	10.67	1.04
nontrivial	M06-2X	molecule_13.log	2.76	7.22	3.66	10.65	0.92
nontrivial	M06-2X	molecule_18.log	2.71	7.7	3.66	10.64	0.99
nontrivial	M06-2X	molecule_19.log	0	7.31	4.01	10.65	94.85
nontrivial	M06-2X	molecule_23.log	3.77	7.42	3.51	10.65	0.17
nontrivial	M06-2X	molecule_24.log	3.17	7.13	4.05	10.6	0.46
nontrivial	M06-2X	molecule_4.log	3.7	7.14	4.17	10.45	0.19
nontrivial	M06-2X	molecule_7.log	2.73	6.97	3.72	10.67	0.97
nontrivial	M06-2X	molecule_9.log	3.25	5.91	4.17	10.56	0.4
pipi	PM6-DH2	molecule_105.out	0.43	4.6	2.74	7.1	1.2
pipi	PM6-DH2	molecule_106.out	1.6	5	2.68	7.26	0.17
pipi	PM6-DH2	molecule_107.out	0.04	8.71	3.07	7.08	2.28
pipi	PM6-DH2	molecule_109.out	1.02	4.62	1.95	7.13	0.44
pipi	PM6-DH2	molecule_113.out	0.96	8.72	2.84	6.48	0.49
pipi	PM6-DH2	molecule_121.out	0.45	5.01	2.69	7.12	1.15
pipi	PM6-DH2	molecule_124.out	1.17	4.61	1.96	7.09	0.35
pipi	PM6-DH2	molecule_131.out	3.18	4.59	2.45	7.12	0.01
pipi	PM6-DH2	molecule_133.out	0.52	8.67	1.95	7.09	1.02
pipi	PM6-DH2	molecule_134.out	3.6	5.34	1.94	7.2	0.01
pipi	PM6-DH2	molecule_136.out	1.1	5.31	1.92	7.19	0.39
pipi	PM6-DH2	molecule_137.out	0.07	8.79	3.19	7.15	2.19
pipi	PM6-DH2	molecule_138.out	1.31	8.62	1.96	6.91	0.27
pipi	PM6-DH2	molecule_140.out	3.72	4.59	1.96	7.03	0
pipi	PM6-DH2	molecule_146.out	0.98	4.7	1.95	7.09	0.47
pipi	PM6-DH2	molecule_147.out	0.52	8.73	1.95	7.09	1.02
pipi	PM6-DH2	molecule_149.out	3.6	5.22	1.94	7.19	0.01
pipi	PM6-DH2	molecule_152.out	1.03	8.83	1.95	7.13	0.43
pipi	PM6-DH2	molecule_155.out	3.64	5.14	1.95	7.2	0.01
pipi	PM6-DH2	molecule_156.out	0.9	5.01	1.93	7.15	0.54
pipi	PM6-DH2	molecule_157.out	1.71	8.35	1.94	7.19	0.14
pipi	PM6-DH2	molecule_161.out	1.9	6.13	1.93	7.19	0.1
pipi	PM6-DH2	molecule_167.out	2.03	8.34	1.93	7.18	0.08
pipi	PM6-DH2	molecule_170.out	3.58	5.25	1.94	7.2	0.01
pipi	PM6-DH2	molecule_176.out	0	8.77	3.17	7.09	2.46
pipi	PM6-DH2	molecule_177.out	1.78	8.84	2.82	5.31	0.12
pipi	PM6-DH2	molecule_184.out	1.67	8.84	1.93	7.2	0.15
pipi	PM6-DH2	molecule_186.out	0.37	8.79	3	7.03	1.33
pipi	PM6-DH2	molecule_190.out	0.98	8.8	1.95	7.13	0.47
pipi	PM6-DH2	molecule_191.out	0.03	8.76	3.21	7.1	2.34
pipi	PM6-DH2	molecule_194.out	1.26	8.76	1.92	7.2	0.3
pipi	PM6-DH2	molecule_197.out	1.43	8.84	2.87	5.85	0.22
pipi	PM6-DH2	molecule_201.out	0.22	8.84	2.83	7.05	1.71
pipi	PM6-DH2	molecule_204.out	2.81	8.38	1.93	7.32	0.02
pipi	PM6-DH2	molecule_207.out	1.64	8.83	2.85	5.48	0.15
pipi	PM6-DH2	molecule_208.out	1.3	8.83	2.94	6	0.28
pipi	PM6-DH2	molecule_212.out	2.1	8.79	3.07	4.74	0.07
pipi	PM6-DH2	molecule_215.out	1.35	8.76	1.97	6.96	0.25
pipi	PM6-DH2	molecule_217.out	0.95	8.71	2.83	6.43	0.5
pipi	PM6-DH2	molecule_221.out	0.38	8.38	2.76	7.14	1.29
pipi	PM6-DH2	molecule_222.out	2.44	8.73	3.02	4	0.04
pipi	PM6-DH2	molecule_223.out	1.46	8.84	2.86	5.84	0.21
pipi	PM6-DH2	molecule_227.out	0.74	8.77	2.91	7	0.71
pipi	PM6-DH2	molecule_230.out	0.94	4.68	1.95	7.11	0.5
pipi	PM6-DH2	molecule_232.out	0.93	8.09	2.71	7.11	0.51
pipi	PM6-DH2	molecule_234.out	1.49	5.98	1.9	7.14	0.2
pipi	PM6-DH2	molecule_237.out	0.3	8.82	3.03	7.05	1.47
pipi	PM6-DH2	molecule_242.out	0.79	8.33	2.73	7.13	0.65
pipi	PM6-DH2	molecule_243.out	0.01	8.76	3.18	7.09	2.41
pipi	PM6-DH2	molecule_244.out	1.11	5.51	1.91	7.17	0.38
pipi	PM6-DH2	molecule_245.out	0.89	4.86	1.94	7.13	0.55
pipi	PM6-DH2	molecule_246.out	0.44	5	2.7	7.13	1.17
pipi	PM6-DH2	molecule_247.out	0.35	8.56	2.87	7.12	1.36
pipi	PM6-DH2	molecule_27.out	1.61	8.81	1.92	7.2	0.16
pipi	PM6-DH2	molecule_276.out	0.93	5.17	1.93	7.18	0.51
pipi	PM6-DH2	molecule_277.out	1.68	8.83	1.91	7.2	0.15
pipi	PM6-DH2	molecule_281.out	1.37	5.8	1.92	7.16	0.25
pipi	PM6-DH2	molecule_286.out	2.21	6.15	1.94	7.14	0.06
pipi	PM6-DH2	molecule_287.out	1.59	8.57	1.91	7.22	0.17
pipi	PM6-DH2	molecule_288.out	1.7	8.84	1.92	7.22	0.14
pipi	PM6-DH2	molecule_291.out	0.92	5.25	1.92	7.19	0.53
pipi	PM6-DH2	molecule_297.out	1.52	8.73	1.91	7.21	0.19
pipi	PM6-DH2	molecule_298.out	1.19	8.78	1.93	7.2	0.33
pipi	PM6-DH2	molecule_30.out	3.61	5.31	1.94	7.19	0.01
pipi	PM6-DH2	molecule_329.out	0.53	8.69	1.95	7.14	1.01
pipi	PM6-DH2	molecule_331.out	0.95	8.22	2.75	7.11	0.5
pipi	PM6-DH2	molecule_334.out	1.92	8.39	1.93	7.18	0.1
pipi	PM6-DH2	molecule_336.out	2.41	7.63	2.6	6.9	0.04
pipi	PM6-DH2	molecule_344.out	0.52	8.66	1.95	7.1	1.02
pipi	PM6-DH2	molecule_345.out	0.55	8.73	1.95	7.06	0.98
pipi	PM6-DH2	molecule_346.out	0.81	8.26	2.74	7.13	0.63
pipi	PM6-DH2	molecule_347.out	0.87	8.73	2.86	6.45	0.57
pipi	PM6-DH2	molecule_349.out	2.2	8.4	1.94	7.16	0.06
pipi	PM6-DH2	molecule_351.out	0.65	5.15	2.73	7.16	0.82
pipi	PM6-DH2	molecule_352.out	0.57	8.81	2.6	7.09	0.94
pipi	PM6-DH2	molecule_355.out	0.43	4.99	2.72	7.14	1.19
pipi	PM6-DH2	molecule_356.out	0.55	5.07	2.72	7.14	0.98
pipi	PM6-DH2	molecule_357.out	0.39	8.39	2.77	7.13	1.27
pipi	PM6-DH2	molecule_361.out	1.31	6.2	2.64	7.08	0.27
pipi	PM6-DH2	molecule_362.out	0.29	8.85	2.8	7.09	1.51
pipi	PM6-DH2	molecule_37.out	1.57	8.81	1.93	7.2	0.17
pipi	PM6-DH2	molecule_370.out	3.1	4.58	2.7	7.06	0.01
pipi	PM6-DH2	molecule_371.out	0.41	4.83	2.72	7.12	1.24
pipi	PM6-DH2	molecule_377.out	0.07	8.83	2.95	7.1	2.19
pipi	PM6-DH2	molecule_380.out	3.78	4.59	1.96	7.04	0
pipi	PM6-DH2	molecule_384.out	3.58	5.24	1.95	7.21	0.01
pipi	PM6-DH2	molecule_386.out	0.87	4.86	1.94	7.16	0.57
pipi	PM6-DH2	molecule_387.out	0.09	8.82	3.11	7.12	2.13
pipi	PM6-DH2	molecule_388.out	2.89	8.82	2.26	6.46	0.02
pipi	PM6-DH2	molecule_390.out	3.75	4.62	1.96	7.1	0
pipi	PM6-DH2	molecule_391.out	3.57	4.58	2.57	7.09	0.01
pipi	PM6-DH2	molecule_398.out	0.57	8.73	1.95	7.06	0.95
pipi	PM6-DH2	molecule_426.out	0.94	8.81	2.9	6.44	0.51
pipi	PM6-DH2	molecule_430.out	1.27	8.61	1.96	6.99	0.29
pipi	PM6-DH2	molecule_431.out	0.13	8.84	2.93	7.08	1.99
pipi	PM6-DH2	molecule_434.out	1.79	8.85	1.91	7.21	0.12
pipi	PM6-DH2	molecule_437.out	1.56	8.82	3	5.67	0.18
pipi	PM6-DH2	molecule_444.out	1.75	8.84	1.92	7.21	0.13
pipi	PM6-DH2	molecule_454.out	2.92	8.73	1.96	7.35	0.02
pipi	PM6-DH2	molecule_461.out	0.79	8.72	2.89	6.69	0.65
pipi	PM6-DH2	molecule_465.out	2.79	8.82	2.26	6.51	0.02
pipi	PM6-DH2	molecule_466.out	0.24	8.84	2.83	7.1	1.64
pipi	PM6-DH2	molecule_469.out	1.58	8.6	1.91	7.2	0.17
pipi	PM6-DH2	molecule_47.out	1.62	8.63	1.91	7.21	0.16
pipi	PM6-DH2	molecule_471.out	0.25	8.83	3.05	7.09	1.62
pipi	PM6-DH2	molecule_473.out	1.81	8.83	2.91	5.3	0.12
pipi	PM6-DH2	molecule_477.out	0.93	8.84	2.93	6.4	0.52
pipi	PM6-DH2	molecule_480.out	4.04	6.37	2.5	6.93	0
pipi	PM6-DH2	molecule_481.out	1.23	6.18	2.64	7.07	0.31
pipi	PM6-DH2	molecule_484.out	2.29	6.02	1.92	7.13	0.05
pipi	PM6-DH2	molecule_486.out	3.54	5.44	2.6	7.24	0.01
pipi	PM6-DH2	molecule_492.out	2.38	7.62	2.6	6.92	0.04
pipi	PM6-DH2	molecule_495.out	2.28	7.34	1.97	7.05	0.05
pipi	PM6-DH2	molecule_496.out	1.25	6.18	2.62	7.1	0.3
pipi	PM6-DH2	molecule_498.out	0.32	8.79	3.01	7.05	1.43
pipi	PM6-DH2	molecule_499.out	1.93	6.03	1.93	7.19	0.1
pipi	PM6-DH2	molecule_502.out	0.41	8.82	3.09	7.1	1.22
pipi	PM6-DH2	molecule_506.out	3.15	4.73	2.6	7.11	0.01
pipi	PM6-DH2	molecule_513.out	1.3	8.57	1.97	6.95	0.28
pipi	PM6-DH2	molecule_516.out	0.46	4.8	2.73	7.12	1.13
pipi	PM6-DH2	molecule_517.out	0.55	8.66	1.95	7.09	0.98
pipi	PM6-DH2	molecule_521.out	0.9	4.9	1.94	7.15	0.54
pipi	PM6-DH2	molecule_524.out	3.61	5.13	1.95	7.18	0.01
pipi	PM6-DH2	molecule_527.out	1.04	8.83	1.95	7.18	0.43
pipi	PM6-DH2	molecule_532.out	0.5	8.65	1.95	7.11	1.05
pipi	PM6-DH2	molecule_536.out	2.21	6.09	1.91	7.14	0.06
pipi	PM6-DH2	molecule_538.out	1.96	8.84	1.91	7.19	0.09
pipi	PM6-DH2	molecule_542.out	1.93	8.34	1.93	7.18	0.1
pipi	PM6-DH2	molecule_545.out	3.6	5.35	1.94	7.2	0.01
pipi	PM6-DH2	molecule_546.out	1.35	5.85	1.91	7.13	0.26
pipi	PM6-DH2	molecule_552.out	2.12	8.82	2.85	4.77	0.07
pipi	PM6-DH2	molecule_555.out	0.71	8.75	1.95	7.14	0.75
pipi	PM6-DH2	molecule_556.out	0.45	8.84	2.74	7.02	1.15
pipi	PM6-DH2	molecule_561.out	0.24	8.78	3.02	7.07	1.64
pipi	PM6-DH2	molecule_565.out	1.15	8.84	1.96	7.02	0.36
pipi	PM6-DH2	molecule_566.out	0.05	8.82	3.05	7.1	2.26
pipi	PM6-DH2	molecule_567.out	2.33	8.7	3.21	4.08	0.05
pipi	PM6-DH2	molecule_572.out	1.36	8.85	2.82	6.03	0.25
pipi	PM6-DH2	molecule_576.out	0.07	8.68	3.08	7.08	2.2
pipi	PM6-DH2	molecule_581.out	0.76	8.2	2.74	7.12	0.69
pipi	PM6-DH2	molecule_583.out	0.81	8.82	2.94	6.66	0.63
pipi	PM6-DH2	molecule_584.out	0.55	8.61	1.95	7.11	0.97
pipi	PM6-DH2	molecule_587.out	1.64	8.82	3.02	5.53	0.16
pipi	PM6-DH2	molecule_590.out	1.31	8.62	1.97	6.9	0.27
pipi	PM6-DH2	molecule_591.out	0.39	8.43	2.76	7.12	1.28
pipi	PM6-DH2	molecule_595.out	0.57	8.69	1.95	7.13	0.94
pipi	PM6-DH2	molecule_596.out	0.79	8.33	2.72	7.14	0.65
pipi	PM6-DH2	molecule_597.out	1.7	8.85	2.84	5.55	0.14
pipi	PM6-DH2	molecule_599.out	1.69	8.34	1.94	7.18	0.14
pipi	PM6-DH2	molecule_602.out	0.45	8.86	2.86	7.12	1.16
pipi	PM6-DH2	molecule_605.out	3.18	4.69	2.55	7.13	0.01
pipi	PM6-DH2	molecule_607.out	0.8	8.14	2.74	7.12	0.64
pipi	PM6-DH2	molecule_609.out	0.96	5.27	1.92	7.18	0.49
pipi	PM6-DH2	molecule_611.out	1.25	6.17	2.64	7.07	0.3
pipi	PM6-DH2	molecule_612.out	0.13	8.83	3.07	7.11	1.99
pipi	PM6-DH2	molecule_615.out	3.16	5.05	2.65	7.14	0.01
pipi	PM6-DH2	molecule_616.out	0.62	5.11	2.71	7.16	0.86
pipi	PM6-DH2	molecule_617.out	0.89	8.25	2.76	7.14	0.55
pipi	PM6-DH2	molecule_619.out	1.34	5.85	1.91	7.15	0.26
pipi	PM6-DH2	molecule_622.out	0.07	8.66	2.99	7.13	2.19
pipi	PM6-DH2	molecule_624.out	0.91	5.06	1.93	7.17	0.54
pipi	PM6-DH2	molecule_79.out	4.23	8.55	2.05	7.37	0
pipi	PM6-DH2	molecule_81.out	0.26	8.85	3.02	7.12	1.59
pipi	PM6-DH2	molecule_84.out	1.16	8.83	1.94	7.15	0.35
pipi	PM6-DH2	molecule_86.out	1.01	8.84	2.91	6.33	0.45
pipi	PM6-DH2	molecule_87.out	2.24	8.81	2.88	4.59	0.06
pipi	PM6-DH2	molecule_90.out	4.41	8.23	2.22	6.44	0
pipi	PM6-DH2	molecule_96.out	0.57	8.84	2.99	6.96	0.94
pipi	PM6-DH2	molecule_98.out	1.88	8.83	2.95	5.19	0.1
pipi	PM7	molecule_101.out	0.15	4.8	2.75	7.07	2.27
pipi	PM7	molecule_102.out	0.08	8.74	3.19	7.04	2.54
pipi	PM7	molecule_109.out	1.18	4.6	1.95	7.01	0.4
pipi	PM7	molecule_112.out	0.07	8.77	3.06	7	2.6
pipi	PM7	molecule_115.out	0.15	4.69	2.75	7.07	2.25
pipi	PM7	molecule_117.out	3.21	7.92	2.73	7.25	0.01
pipi	PM7	molecule_127.out	0	8.77	3.14	7.05	2.9
pipi	PM7	molecule_134.out	3.65	5.18	1.94	7.12	0.01
pipi	PM7	molecule_136.out	0.72	4.86	1.93	7.1	0.87
pipi	PM7	molecule_140.out	3.63	4.99	1.94	7.05	0.01
pipi	PM7	molecule_146.out	0.78	4.74	1.94	7.03	0.78
pipi	PM7	molecule_148.out	1.12	8.68	1.95	6.96	0.44
pipi	PM7	molecule_149.out	3.65	5.17	1.94	7.12	0.01
pipi	PM7	molecule_155.out	3.7	5.06	1.95	7.11	0.01
pipi	PM7	molecule_157.out	1.08	8.57	1.96	6.95	0.48
pipi	PM7	molecule_161.out	2.09	6.94	1.91	7.15	0.09
pipi	PM7	molecule_167.out	1.36	8.81	1.94	7.04	0.3
pipi	PM7	molecule_170.out	3.64	5.21	1.94	7.16	0.01
pipi	PM7	molecule_177.out	1.47	8.79	3.02	5.09	0.24
pipi	PM7	molecule_180.out	1.17	8.78	1.95	7.01	0.4
pipi	PM7	molecule_181.out	0.05	8.8	2.98	7.04	2.68
pipi	PM7	molecule_186.out	0.45	8.75	3	6.98	1.37
pipi	PM7	molecule_195.out	1.15	8.72	1.96	6.94	0.42
pipi	PM7	molecule_197.out	1.34	8.81	2.91	5.72	0.3
pipi	PM7	molecule_204.out	4.12	8.2	1.95	7.35	0
pipi	PM7	molecule_211.out	1.35	8.82	2.84	5.72	0.3
pipi	PM7	molecule_217.out	1.04	8.81	2.93	6.4	0.51
pipi	PM7	molecule_220.out	1.09	8.64	1.98	6.97	0.47
pipi	PM7	molecule_221.out	0.16	8.68	3	7.08	2.2
pipi	PM7	molecule_223.out	1.38	8.81	2.88	5.7	0.29
pipi	PM7	molecule_226.out	0.16	4.89	2.73	7.07	2.23
pipi	PM7	molecule_230.out	0.75	4.95	1.93	7.09	0.82
pipi	PM7	molecule_236.out	1.4	7.63	2.69	6.98	0.27
pipi	PM7	molecule_237.out	0.18	8.75	3.04	7.05	2.13
pipi	PM7	molecule_242.out	1.5	7.75	2.71	7.11	0.23
pipi	PM7	molecule_245.out	0.79	4.65	1.94	7.04	0.77
pipi	PM7	molecule_246.out	0.13	4.8	2.72	7.08	2.31
pipi	PM7	molecule_247.out	0.33	8.55	2.9	7.1	1.67
pipi	PM7	molecule_27.out	1.15	8.71	1.97	6.91	0.42
pipi	PM7	molecule_277.out	1.84	8.8	1.92	7.17	0.13
pipi	PM7	molecule_286.out	0.74	5.04	1.92	7.12	0.83
pipi	PM7	molecule_287.out	1.56	8.79	1.92	7.16	0.21
pipi	PM7	molecule_288.out	3.9	8.78	1.92	6.88	0
pipi	PM7	molecule_296.out	0.87	5.19	1.92	7.12	0.67
pipi	PM7	molecule_297.out	1.27	8.78	1.93	7.1	0.35
pipi	PM7	molecule_30.out	3.67	5.18	1.94	7.12	0.01
pipi	PM7	molecule_316.out	0.07	8.81	3.01	7.08	2.6
pipi	PM7	molecule_32.out	4.29	7.83	1.92	7.25	0
pipi	PM7	molecule_326.out	3.17	7.88	2.74	7.25	0.01
pipi	PM7	molecule_330.out	1.08	8.54	1.95	7.02	0.47
pipi	PM7	molecule_331.out	1.72	7.89	2.73	7.12	0.16
pipi	PM7	molecule_334.out	2.7	8.03	1.93	7.14	0.03
pipi	PM7	molecule_336.out	2.99	7.5	2.56	6.66	0.02
pipi	PM7	molecule_337.out	1.06	8.78	2.88	6.27	0.48
pipi	PM7	molecule_340.out	1.18	8.42	1.95	7.03	0.4
pipi	PM7	molecule_341.out	1.51	7.52	2.71	7.07	0.23
pipi	PM7	molecule_347.out	1	8.78	2.9	6.44	0.54
pipi	PM7	molecule_349.out	2.89	8.32	1.94	7.11	0.02
pipi	PM7	molecule_355.out	0.18	4.78	2.73	7.07	2.13
pipi	PM7	molecule_359.out	0.92	4.83	1.93	7.07	0.62
pipi	PM7	molecule_361.out	1.59	6.92	2.57	6.93	0.2
pipi	PM7	molecule_363.out	0	8.72	3.05	7.06	2.9
pipi	PM7	molecule_367.out	1.75	7.92	2.75	7.06	0.15
pipi	PM7	molecule_369.out	0.74	5.01	1.93	7.12	0.84
pipi	PM7	molecule_371.out	0.8	5.69	2.69	7.03	0.76
pipi	PM7	molecule_377.out	0.04	8.72	3.06	7.07	2.73
pipi	PM7	molecule_380.out	3.85	4.97	1.95	7.07	0
pipi	PM7	molecule_383.out	1.11	8.64	1.96	6.87	0.45
pipi	PM7	molecule_384.out	3.65	5.19	1.94	7.14	0.01
pipi	PM7	molecule_388.out	2.98	8.79	2.22	6.36	0.02
pipi	PM7	molecule_391.out	3.09	4.57	2.55	6.98	0.02
pipi	PM7	molecule_395.out	3.74	4.89	1.95	7.03	0.01
pipi	PM7	molecule_42.out	0.77	4.83	1.94	7.05	0.8
pipi	PM7	molecule_426.out	2.5	8.77	2.7	7.15	0.04
pipi	PM7	molecule_430.out	1.09	8.59	1.95	6.94	0.47
pipi	PM7	molecule_431.out	0	8.77	3.13	7.06	2.89
pipi	PM7	molecule_434.out	2.97	8.78	1.9	7.08	0.02
pipi	PM7	molecule_441.out	0.08	8.74	3.15	7	2.52
pipi	PM7	molecule_444.out	1.34	8.8	1.93	7.11	0.31
pipi	PM7	molecule_454.out	3.84	8.67	1.97	7.31	0
pipi	PM7	molecule_461.out	1.32	8.81	2.89	5.77	0.32
pipi	PM7	molecule_463.out	1.36	8.8	2.98	5.56	0.29
pipi	PM7	molecule_467.out	1.08	8.79	2.88	6.27	0.47
pipi	PM7	molecule_47.out	4	8.78	1.96	7.36	0
pipi	PM7	molecule_477.out	1.07	8.8	2.89	6.33	0.48
pipi	PM7	molecule_481.out	1.73	6.4	2.58	7.01	0.16
pipi	PM7	molecule_484.out	2.2	7.4	1.95	7.1	0.07
pipi	PM7	molecule_487.out	2.27	8.81	2.79	7.2	0.06
pipi	PM7	molecule_488.out	0.72	8.82	3.01	6.88	0.86
pipi	PM7	molecule_491.out	1.8	6.5	2.59	6.99	0.14
pipi	PM7	molecule_492.out	3.2	8.04	2.64	6.34	0.01
pipi	PM7	molecule_493.out	1.42	8.81	2.88	5.52	0.27
pipi	PM7	molecule_494.out	0.71	4.9	1.93	7.09	0.88
pipi	PM7	molecule_495.out	1.19	8.38	1.95	7.02	0.39
pipi	PM7	molecule_497.out	2.07	8.73	3.19	7.19	0.09
pipi	PM7	molecule_498.out	0.88	8.8	2.98	6.77	0.66
pipi	PM7	molecule_499.out	2.63	6.15	1.93	7.09	0.04
pipi	PM7	molecule_506.out	3.04	4.72	2.62	7.07	0.02
pipi	PM7	molecule_508.out	1.12	8.72	1.96	7.04	0.44
pipi	PM7	molecule_522.out	1.15	8.7	1.96	6.84	0.42
pipi	PM7	molecule_524.out	3.66	5.08	1.95	7.13	0.01
pipi	PM7	molecule_527.out	1.41	8.81	1.94	7.07	0.27
pipi	PM7	molecule_531.out	0.84	5.1	1.92	7.1	0.7
pipi	PM7	molecule_536.out	0.73	4.86	1.93	7.09	0.85
pipi	PM7	molecule_538.out	2.88	8.78	1.89	7.08	0.02
pipi	PM7	molecule_542.out	2.8	8.03	1.93	7.11	0.03
pipi	PM7	molecule_545.out	3.64	5.19	1.94	7.13	0.01
pipi	PM7	molecule_546.out	0.71	4.92	1.93	7.09	0.88
pipi	PM7	molecule_547.out	1.09	8.62	1.95	6.98	0.47
pipi	PM7	molecule_548.out	3.05	8.78	1.9	7.04	0.02
pipi	PM7	molecule_552.out	1.5	8.76	3.07	4.73	0.23
pipi	PM7	molecule_555.out	1.14	8.71	1.95	7.01	0.43
pipi	PM7	molecule_557.out	1.02	8.8	2.94	6.5	0.52
pipi	PM7	molecule_561.out	0.28	8.74	3.02	7.05	1.81
pipi	PM7	molecule_565.out	1.4	8.82	1.95	6.9	0.28
pipi	PM7	molecule_567.out	1.59	8.63	3.25	4.33	0.2
pipi	PM7	molecule_570.out	1.11	8.69	1.98	6.92	0.45
pipi	PM7	molecule_571.out	0.09	8.8	3.01	7	2.49
pipi	PM7	molecule_572.out	1.29	8.81	2.93	5.9	0.33
pipi	PM7	molecule_576.out	0.18	8.81	2.97	7.02	2.13
pipi	PM7	molecule_577.out	1.49	8.79	2.93	4.87	0.24
pipi	PM7	molecule_579.out	4.36	7.81	1.93	7.29	0
pipi	PM7	molecule_581.out	0.9	8.07	2.75	7.08	0.63
pipi	PM7	molecule_583.out	0.95	8.8	2.94	6.58	0.59
pipi	PM7	molecule_587.out	1.51	8.8	2.93	4.99	0.23
pipi	PM7	molecule_591.out	0.01	8.75	3.07	7.05	2.86
pipi	PM7	molecule_595.out	1.08	8.56	1.95	7.04	0.47
pipi	PM7	molecule_601.out	0.3	5.14	2.72	7.07	1.77
pipi	PM7	molecule_605.out	3.01	4.75	2.57	7.08	0.02
pipi	PM7	molecule_608.out	0.02	8.7	3.03	7.07	2.81
pipi	PM7	molecule_609.out	0.8	5.05	1.92	7.1	0.75
pipi	PM7	molecule_611.out	1.37	7.03	2.57	7.04	0.29
pipi	PM7	molecule_616.out	0.27	5.07	2.73	7.09	1.85
pipi	PM7	molecule_617.out	1.78	7.94	2.73	7.09	0.15
pipi	PM7	molecule_619.out	0.76	5.07	1.92	7.13	0.81
pipi	PM7	molecule_620.out	3.04	4.56	2.47	7.05	0.02
pipi	PM7	molecule_80.out	0	8.71	3.05	7.07	2.89
pipi	PM7	molecule_82.out	1.49	8.78	2.97	4.79	0.24
pipi	PM7	molecule_83.out	1.5	8.77	2.99	4.71	0.23
pipi	PM7	molecule_84.out	1.39	8.81	1.94	7.07	0.28
pipi	PM7	molecule_90.out	4.52	8.31	2.12	6.33	0
pipi	PM7	molecule_94.out	3.29	8.79	1.9	6.99	0.01
pipi	PM7	molecule_95.out	0.03	8.72	3.16	7.07	2.77
pipi	PM7	molecule_96.out	1.84	8.56	2.67	7.03	0.13
pipi	PM7	molecule_97.out	1.55	8.75	3.11	4.56	0.22
pipi	PM7	molecule_98.out	1.51	8.79	3.03	5	0.23
pipi	PM7	molecule_99.out	1.37	8.8	1.94	7.08	0.29
pipi	PM7 Precise	molecule_109.out	0.7	4.86	1.93	7.09	1.81
pipi	PM7 Precise	molecule_134.out	3.68	5.28	1.94	7.14	0.01
pipi	PM7 Precise	molecule_145.out	3.66	5.26	1.94	7.14	0.01
pipi	PM7 Precise	molecule_155.out	3.65	5.27	1.94	7.14	0.01
pipi	PM7 Precise	molecule_161.out	0.7	4.91	1.93	7.1	1.82
pipi	PM7 Precise	molecule_167.out	1.26	8.8	1.94	7.09	0.71
pipi	PM7 Precise	molecule_170.out	3.67	5.28	1.94	7.14	0.01
pipi	PM7 Precise	molecule_195.out	1.22	8.74	1.94	7.07	0.75
pipi	PM7 Precise	molecule_205.out	1.23	8.79	1.94	7.08	0.74
pipi	PM7 Precise	molecule_215.out	2.39	8.67	2	6.56	0.11
pipi	PM7 Precise	molecule_217.out	1.17	8.82	2.89	6.18	0.82
pipi	PM7 Precise	molecule_223.out	1.56	8.69	3.18	4.37	0.42
pipi	PM7 Precise	molecule_234.out	0.7	4.9	1.93	7.09	1.81
pipi	PM7 Precise	molecule_240.out	0.7	4.88	1.93	7.09	1.81
pipi	PM7 Precise	molecule_248.out	0.04	8.75	3.06	7.08	5.51
pipi	PM7 Precise	molecule_282.out	1.07	8.64	1.96	6.97	0.97
pipi	PM7 Precise	molecule_296.out	0.69	4.9	1.93	7.1	1.84
pipi	PM7 Precise	molecule_297.out	1.21	8.79	1.94	7.08	0.77
pipi	PM7 Precise	molecule_30.out	3.67	5.28	1.94	7.15	0.01
pipi	PM7 Precise	molecule_32.out	1.09	8.67	1.97	6.98	0.95
pipi	PM7 Precise	molecule_336.out	2.95	7.72	2.57	6.64	0.04
pipi	PM7 Precise	molecule_337.out	1.21	8.78	2.91	6.08	0.77
pipi	PM7 Precise	molecule_349.out	1.23	8.79	1.94	7.09	0.75
pipi	PM7 Precise	molecule_356.out	0.11	4.73	2.73	7.06	4.89
pipi	PM7 Precise	molecule_362.out	0.03	8.76	3.07	7.07	5.62
pipi	PM7 Precise	molecule_366.out	0.11	4.68	2.74	7.06	4.9
pipi	PM7 Precise	molecule_381.out	0.7	4.87	1.93	7.09	1.82
pipi	PM7 Precise	molecule_384.out	3.66	5.28	1.94	7.14	0.01
pipi	PM7 Precise	molecule_437.out	1.56	8.68	3.2	4.37	0.42
pipi	PM7 Precise	molecule_476.out	0.04	8.76	3.06	7.07	5.49
pipi	PM7 Precise	molecule_481.out	1.66	6.75	2.56	7.03	0.36
pipi	PM7 Precise	molecule_482.out	1.04	8.79	2.88	6.31	1.03
pipi	PM7 Precise	molecule_487.out	1.94	8.75	3.27	7.23	0.23
pipi	PM7 Precise	molecule_494.out	0.7	4.87	1.93	7.09	1.82
pipi	PM7 Precise	molecule_498.out	0.77	8.78	2.97	6.8	1.63
pipi	PM7 Precise	molecule_501.out	0.11	4.72	2.73	7.06	4.9
pipi	PM7 Precise	molecule_511.out	2.07	6.65	2.55	7.11	0.18
pipi	PM7 Precise	molecule_524.out	3.66	5.28	1.94	7.14	0.01
pipi	PM7 Precise	molecule_532.out	1.24	8.8	1.94	7.08	0.73
pipi	PM7 Precise	molecule_545.out	3.67	5.28	1.94	7.14	0.01
pipi	PM7 Precise	molecule_546.out	0.69	4.85	1.93	7.08	1.83
pipi	PM7 Precise	molecule_548.out	1.25	8.79	1.94	7.1	0.72
pipi	PM7 Precise	molecule_552.out	1.58	8.68	3.17	4.27	0.41
pipi	PM7 Precise	molecule_572.out	1.32	8.8	2.98	5.74	0.64
pipi	PM7 Precise	molecule_579.out	1.07	8.63	1.96	6.96	0.98
pipi	PM7 Precise	molecule_581.out	0.78	8.17	2.76	7.05	1.6
pipi	PM7 Precise	molecule_584.out	1.25	8.79	1.94	7.09	0.72
pipi	PM7 Precise	molecule_586.out	1.58	8.83	2.91	5.3	0.41
pipi	PM7 Precise	molecule_587.out	1.5	8.8	3.02	5.24	0.48
pipi	PM7 Precise	molecule_591.out	0.04	8.76	3.07	7.08	5.51
pipi	PM7 Precise	molecule_597.out	1.5	8.75	3.06	4.78	0.48
pipi	PM7 Precise	molecule_602.out	0.03	8.75	3.06	7.07	5.63
pipi	PM7 Precise	molecule_605.out	2.98	4.72	2.62	7.05	0.04
pipi	PM7 Precise	molecule_613.out	0	8.77	3.13	7.06	5.89
pipi	PM7 Precise	molecule_616.out	0.11	4.7	2.73	7.06	4.88
pipi	PM7 Precise	molecule_624.out	0.7	4.91	1.93	7.1	1.82
pipi	PM7 Precise	molecule_81.out	0.03	8.76	3.07	7.07	5.59
pipi	PM7 Precise	molecule_83.out	1.58	8.68	3.18	4.31	0.42
pipi	PM7 Precise	molecule_91.out	0.05	8.76	3.06	7.08	5.44
pipi	B3LYP	molecule_107.log	0	8.81	3.14	7.19	7.71
pipi	B3LYP	molecule_121.log	0.19	4.61	2.72	7.19	5.6
pipi	B3LYP	molecule_131.log	1.08	4.98	1.94	7.25	1.26
pipi	B3LYP	molecule_134.log	1.08	4.98	1.94	7.25	1.26
pipi	B3LYP	molecule_148.log	1.42	8.78	1.95	7.24	0.71
pipi	B3LYP	molecule_157.log	1.42	8.78	1.95	7.24	0.71
pipi	B3LYP	molecule_184.log	1.42	8.78	1.95	7.24	0.71
pipi	B3LYP	molecule_187.log	3.56	8.78	2.87	5.05	0.02
pipi	B3LYP	molecule_191.log	0	8.81	3.14	7.19	7.71
pipi	B3LYP	molecule_212.log	3.56	8.78	2.87	5.05	0.02
pipi	B3LYP	molecule_226.log	0.19	4.61	2.72	7.19	5.6
pipi	B3LYP	molecule_233.log	0	8.81	3.14	7.19	7.71
pipi	B3LYP	molecule_241.log	0.19	4.61	2.72	7.19	5.6
pipi	B3LYP	molecule_291.log	1.08	4.98	1.94	7.25	1.26
pipi	B3LYP	molecule_301.log	0	8.81	3.14	7.19	7.71
pipi	B3LYP	molecule_331.log	4.44	7.77	2.72	7.2	0
pipi	B3LYP	molecule_344.log	1.42	8.78	1.95	7.24	0.71
pipi	B3LYP	molecule_369.log	1.08	4.98	1.94	7.25	1.26
pipi	B3LYP	molecule_37.log	1.42	8.78	1.95	7.24	0.71
pipi	B3LYP	molecule_373.log	0	8.81	3.14	7.19	7.71
pipi	B3LYP	molecule_377.log	1.42	8.78	1.95	7.24	0.71
pipi	B3LYP	molecule_386.log	1.08	4.98	1.94	7.25	1.26
pipi	B3LYP	molecule_395.log	1.08	4.98	1.94	7.25	1.26
pipi	B3LYP	molecule_436.log	0	8.81	3.14	7.19	7.71
pipi	B3LYP	molecule_445.log	0	8.81	3.14	7.19	7.71
pipi	B3LYP	molecule_459.log	1.42	8.78	1.95	7.24	0.71
pipi	B3LYP	molecule_473.log	3.56	8.78	2.87	5.05	0.02
pipi	B3LYP	molecule_506.log	0.19	4.61	2.72	7.19	5.6
pipi	B3LYP	molecule_509.log	1.08	4.98	1.94	7.25	1.26
pipi	B3LYP	molecule_520.log	1.08	4.98	1.94	7.25	1.26
pipi	B3LYP	molecule_562.log	3.56	8.78	2.86	5.05	0.02
pipi	B3LYP	molecule_572.log	3.56	8.78	2.87	5.05	0.02
pipi	B3LYP	molecule_587.log	3.56	8.78	2.87	5.05	0.02
pipi	B3LYP	molecule_599.log	1.42	8.78	1.95	7.24	0.71
pipi	B3LYP	molecule_602.log	0	8.81	3.14	7.19	7.71
pipi	B3LYP	molecule_97.log	3.56	8.78	2.87	5.05	0.02
pipi	B3LYP	molecule_98.log	3.56	8.78	2.87	5.05	0.02
pipi	wB97xD	molecule_101.log	0.64	4.59	2.72	7.11	1.62
pipi	wB97xD	molecule_123.log	0.2	8.83	3.1	7.12	3.41
pipi	wB97xD	molecule_124.log	0.44	4.88	1.93	7.16	2.27
pipi	wB97xD	molecule_134.log	3.25	5.52	1.93	7.21	0.02
pipi	wB97xD	molecule_145.log	3.46	5.73	1.93	7.25	0.01
pipi	wB97xD	molecule_147.log	0	8.81	1.93	7.2	4.74
pipi	wB97xD	molecule_149.log	3.25	5.52	1.93	7.21	0.02
pipi	wB97xD	molecule_170.log	3.25	5.52	1.93	7.21	0.02
pipi	wB97xD	molecule_195.log	0	8.81	1.93	7.2	4.74
pipi	wB97xD	molecule_208.log	0.82	8.81	2.66	4.57	1.2
pipi	wB97xD	molecule_223.log	0.82	8.81	2.66	4.57	1.2
pipi	wB97xD	molecule_238.log	0.2	8.83	3.1	7.12	3.41
pipi	wB97xD	molecule_248.log	0.2	8.83	3.1	7.12	3.41
pipi	wB97xD	molecule_280.log	3.25	5.52	1.93	7.21	0.02
pipi	wB97xD	molecule_281.log	0.44	4.88	1.93	7.16	2.27
pipi	wB97xD	molecule_287.log	0	8.81	1.93	7.2	4.74
pipi	wB97xD	molecule_301.log	0.2	8.83	3.1	7.12	3.41
pipi	wB97xD	molecule_359.log	0.44	4.88	1.93	7.16	2.27
pipi	wB97xD	molecule_369.log	0.44	4.88	1.93	7.16	2.27
pipi	wB97xD	molecule_376.log	0.44	4.89	1.93	7.16	2.27
pipi	wB97xD	molecule_384.log	3.25	5.52	1.93	7.21	0.02
pipi	wB97xD	molecule_42.log	0.44	4.89	1.93	7.16	2.27
pipi	wB97xD	molecule_434.log	0	8.81	1.93	7.2	4.74
pipi	wB97xD	molecule_437.log	0.82	8.81	2.66	4.57	1.2
pipi	wB97xD	molecule_446.log	0.2	8.83	3.1	7.12	3.41
pipi	wB97xD	molecule_462.log	0.82	8.81	2.66	4.57	1.2
pipi	wB97xD	molecule_47.log	0	8.81	1.93	7.2	4.74
pipi	wB97xD	molecule_472.log	0.82	8.81	2.66	4.57	1.2
pipi	wB97xD	molecule_486.log	0.64	4.59	2.72	7.11	1.62
pipi	wB97xD	molecule_490.log	0.64	4.59	2.72	7.11	1.62
pipi	wB97xD	molecule_515.log	0.44	4.88	1.93	7.16	2.27
pipi	wB97xD	molecule_524.log	3.25	5.52	1.93	7.21	0.02
pipi	wB97xD	molecule_530.log	3.25	5.52	1.93	7.21	0.02
pipi	wB97xD	molecule_537.log	0	8.81	1.93	7.2	4.74
pipi	wB97xD	molecule_540.log	3.25	5.52	1.93	7.21	0.02
pipi	wB97xD	molecule_557.log	2.02	8.85	2.86	6.37	0.16
pipi	wB97xD	molecule_581.log	0.2	8.83	3.1	7.12	3.41
pipi	wB97xD	molecule_583.log	2.02	8.85	2.86	6.38	0.16
pipi	wB97xD	molecule_595.log	0	8.81	1.93	7.2	4.74
pipi	wB97xD	molecule_597.log	0.82	8.81	2.66	4.57	1.2
pipi	wB97xD	molecule_608.log	0.2	8.83	3.1	7.12	3.41
pipi	wB97xD	molecule_609.log	0.44	4.88	1.93	7.16	2.27
pipi	wB97xD	molecule_621.log	0.64	4.59	2.72	7.11	1.62
pipi	wB97xD	molecule_80.log	0	8.81	1.93	7.2	4.74
pipi	wB97xD	molecule_87.log	0.82	8.81	2.66	4.57	1.2
pipi	wB97xD	molecule_96.log	0.2	8.83	3.1	7.12	3.41
pipi	wB97xD	molecule_98.log	0.82	8.81	2.66	4.57	1.2
pipi	M06-2X	molecule_119.log	0.23	4.78	1.93	7.13	2.62
pipi	M06-2X	molecule_123.log	0	8.84	3	7.08	3.85
pipi	M06-2X	molecule_130.log	0.23	4.78	1.93	7.13	2.62
pipi	M06-2X	molecule_134.log	3.39	5.53	1.93	7.19	0.01
pipi	M06-2X	molecule_149.log	3.39	5.53	1.93	7.19	0.01
pipi	M06-2X	molecule_170.log	3.39	5.53	1.93	7.19	0.01
pipi	M06-2X	molecule_172.log	0.02	8.81	1.93	7.18	3.72
pipi	M06-2X	molecule_184.log	0.02	8.81	1.93	7.18	3.72
pipi	M06-2X	molecule_187.log	0.79	8.8	2.62	4.61	1.03
pipi	M06-2X	molecule_195.log	0.02	8.81	1.93	7.18	3.72
pipi	M06-2X	molecule_197.log	0.79	8.8	2.62	4.61	1.03
pipi	M06-2X	molecule_212.log	0.79	8.8	2.62	4.61	1.03
pipi	M06-2X	molecule_222.log	0.79	8.8	2.62	4.61	1.03
pipi	M06-2X	molecule_244.log	0.23	4.78	1.93	7.13	2.63
pipi	M06-2X	molecule_280.log	3.39	5.53	1.93	7.19	0.01
pipi	M06-2X	molecule_287.log	0.02	8.81	1.93	7.18	3.72
pipi	M06-2X	molecule_296.log	0.23	4.79	1.93	7.13	2.62
pipi	M06-2X	molecule_306.log	0	8.84	3	7.08	3.85
pipi	M06-2X	molecule_356.log	0.25	4.59	2.73	7.09	2.54
pipi	M06-2X	molecule_357.log	0	8.84	3	7.08	3.85
pipi	M06-2X	molecule_359.log	0.23	4.78	1.93	7.13	2.62
pipi	M06-2X	molecule_391.log	0.23	4.79	1.93	7.13	2.62
pipi	M06-2X	molecule_392.log	0.02	8.81	1.93	7.18	3.72
pipi	M06-2X	molecule_398.log	0.02	8.81	1.93	7.17	3.72
pipi	M06-2X	molecule_399.log	3.39	5.53	1.93	7.19	0.01
pipi	M06-2X	molecule_454.log	0.02	8.81	1.93	7.18	3.72
pipi	M06-2X	molecule_457.log	0.79	8.8	2.62	4.61	1.03
pipi	M06-2X	molecule_463.log	0.79	8.8	2.62	4.61	1.03
pipi	M06-2X	molecule_473.log	0.79	8.8	2.62	4.61	1.03
pipi	M06-2X	molecule_491.log	0.25	4.59	2.73	7.09	2.54
pipi	M06-2X	molecule_497.log	0	8.84	3	7.08	3.85
pipi	M06-2X	molecule_506.log	0.25	4.59	2.73	7.09	2.54
pipi	M06-2X	molecule_509.log	3.39	5.53	1.93	7.19	0.01
pipi	M06-2X	molecule_513.log	0	8.84	3	7.08	3.85
pipi	M06-2X	molecule_515.log	0.25	4.59	2.73	7.09	2.54
pipi	M06-2X	molecule_530.log	3.39	5.53	1.93	7.19	0.01
pipi	M06-2X	molecule_531.log	0.23	4.78	1.93	7.13	2.62
pipi	M06-2X	molecule_545.log	3.39	5.53	1.93	7.19	0.01
pipi	M06-2X	molecule_555.log	0	8.84	3	7.08	3.85
pipi	M06-2X	molecule_565.log	0	8.84	3	7.08	3.85
pipi	M06-2X	molecule_572.log	0.79	8.8	2.62	4.61	1.03
pipi	M06-2X	molecule_595.log	0.02	8.81	1.93	7.18	3.72
pipi	M06-2X	molecule_609.log	0.23	4.78	1.93	7.13	2.62
pipi	M06-2X	molecule_91.log	0	8.84	3	7.08	3.85
